# Supplementary material for: Pre-complexation of talin and vinculin without tension is required for efficient nascent adhesion maturation
Source: eLife. 2021 Mar 30;10:e66151. doi: 10.7554/eLife.66151 (PMC8009661; doi:10.7554/eLife.66151)
Supplement: Figure 1—source data 1. [file elife-66151-fig1-data1.xlsx]

## Sheet: Sheet1
Row	Edge Protrusion (um/min)	Error Negative	Error Positive
G1,N=1345	0.0913495	0.0435594	0.0435594
G2,N=340	0.0246256	0.123144	0.123144
G3,N=1478	0.233409	0.0250561	0.0250561
G7,N=1459	-0.00609393	0.136429	0.136429
G9,N=5852	0.0134576	0.0625371	0.0625371
