# Supplementary material for: Pre-complexation of talin and vinculin without tension is required for efficient nascent adhesion maturation
Source: eLife. 2021 Mar 30;10:e66151. doi: 10.7554/eLife.66151 (PMC8009661; doi:10.7554/eLife.66151)
Supplement: Figure 1—source data 2. [file elife-66151-fig1-data2.xlsx]

## Sheet: Sheet1
Row	Adhesion movement speed (um/min)	Error Negative	Error Positive
G1,N=1292	-0.00250529	0.0215502	0.0215502
G2,N=322	-0.15835	0.088876	0.088876
G3,N=1345	0.160375	0.0252536	0.0252536
G7,N=1562	-0.0104563	0.024494	0.024494
G9,N=5096	-0.00234012	0.0115437	0.0115437
