# Supplementary material for: Pre-complexation of talin and vinculin without tension is required for efficient nascent adhesion maturation
Source: eLife. 2021 Mar 30;10:e66151. doi: 10.7554/eLife.66151 (PMC8009661; doi:10.7554/eLife.66151)
Supplement: Figure 1—source data 3. [file elife-66151-fig1-data3.xlsx]

## Sheet: Sheet1
Row	Mean intensity (a.u.)	Error Negative	Error Positive
G1,N=1292	5943.79	186.82	186.82
G2,N=322	15790.5	807.795	807.795
G3,N=1345	514.028	213.113	213.113
G7,N=1562	9314.87	271.243	271.243
G9,N=5096	9801.97	152.16	152.16
