# Supplementary material for: Pre-complexation of talin and vinculin without tension is required for efficient nascent adhesion maturation
Source: eLife. 2021 Mar 30;10:e66151. doi: 10.7554/eLife.66151 (PMC8009661; doi:10.7554/eLife.66151)
Supplement: Figure 1—source data 4. [file elife-66151-fig1-data4.xlsx]

## Sheet: Sheet1
Row	Lifetime (sec)	Error Negative	Error Positive
G1,N=1292	39	1.26428	1.26428
G2,N=322	155.5	8.01775	8.01775
G3,N=1345	34	1.28596	1.28596
G7,N=1562	49	1.87052	1.87052
G9,N=5096	36	1.41053	1.41053
