# Supplementary material for: Pre-complexation of talin and vinculin without tension is required for efficient nascent adhesion maturation
Source: eLife. 2021 Mar 30;10:e66151. doi: 10.7554/eLife.66151 (PMC8009661; doi:10.7554/eLife.66151)
Supplement: Figure 1—source data 5. [file elife-66151-fig1-data5.xlsx]

## Sheet: Sheet1
Row	Traction (Pa)	Error Negative	Error Positive
G1,N=622	56.4933	7.46752	7.46752
G2,N=202	84.9281	15.0316	15.0316
G3,N=379	23.1645	6.64645	6.64645
G7,N=423	46.1003	12.1736	12.1736
G9,N=2728	34.2658	3.78392	3.78392
