# Supplementary material for: Pre-complexation of talin and vinculin without tension is required for efficient nascent adhesion maturation
Source: eLife. 2021 Mar 30;10:e66151. doi: 10.7554/eLife.66151 (PMC8009661; doi:10.7554/eLife.66151)
Supplement: Figure 2—source data 1. [file elife-66151-fig2-data1.xlsx]

## Sheet: Sheet1
Row	Median	Upper Adjacent Value	Lower Adjacent Value	Upper Whisker	Lower Whisker	Outlier_ 1	Outlier_ 2	Outlier_ 3	Outlier_ 4	Outlier_ 5	Outlier_ 6	Outlier_ 7	Outlier_ 8	Outlier_ 9	Outlier_10	Outlier_11	Outlier_12	Outlier_13	Outlier_14	Outlier_15	Outlier_16	Outlier_17	Outlier_18	Outlier_19	Outlier_20	Outlier_21	Outlier_22	Outlier_23	Outlier_24	Outlier_25	Outlier_26	Outlier_27	Outlier_28	Outlier_29	Outlier_30	Outlier_31	Outlier_32	Outlier_33	Outlier_34
Pax (N=117)	-18	-2	-49.32	-8.5	-49.32	-73.98	-72	-56	-55.896	-54.252
Vin (N=43)	-8	6	-22	0	-22	-65.76	-56	-36	-32	-32	11.9	57.12
Tal (N=43)	0	8.22	-11.508	3.288	-11.508	-72.336	-66	-65.76	-50.964	-41.1	-39.456	-34.524	-34.524	-34	-29.592	-29.592	-26.304	-24.66	-24	-23.016	-21.372	-21.372	-19.728	-18.084	-18	-18	-14.796	-14	-13.152	-13.152	-13.152	10	11.508	12	18	18.084	22	28	34
