# Supplementary material for: Pre-complexation of talin and vinculin without tension is required for efficient nascent adhesion maturation
Source: eLife. 2021 Mar 30;10:e66151. doi: 10.7554/eLife.66151 (PMC8009661; doi:10.7554/eLife.66151)
Supplement: Figure 2—source data 2. [file elife-66151-fig2-data2.xlsx]

## Sheet: Sheet1
Row	Median	Upper Adjacent Value	Lower Adjacent Value	Upper Whisker	Lower Whisker	Outlier_ 1	Outlier_ 2	Outlier_ 3	Outlier_ 4	Outlier_ 5	Outlier_ 6	Outlier_ 7	Outlier_ 8	Outlier_ 9	Outlier_10	Outlier_11
Pax (N=11)	0	10	-8	6.432	-8	-60	-22	-12	-12	-10	12	16	19.728	22	34	39.456
Vin (N=30)	0	8	-14	2.5	-14	-54.252	-50	-36	-32	-30	12	25	26	52
Tal (N=44)	1.644	10	-9.864	7.809	-9.864	-24.66	14.796
