# Supplementary material for: Pre-complexation of talin and vinculin without tension is required for efficient nascent adhesion maturation
Source: eLife. 2021 Mar 30;10:e66151. doi: 10.7554/eLife.66151 (PMC8009661; doi:10.7554/eLife.66151)
Supplement: Figure 3—source data 1. [file elife-66151-fig3-data1.xlsx]

## Sheet: Sheet1
Tal, G1	Vin, G1	Pax, G1	Tal, G2	Vin, G2	Pax, G2
104.629	9720.27	7504.22	-23.436	9994.78	-39.5057
138.626	3483.99	1714.34	11.9257	17626.2	724.697
101.432	-3079.02	-274.76	20.6894	7734.86	807.473
187.95	4877.52	2127.83	21.4966	8731	353.792
-114.212	4548.85	196.574	18.7257	16016.2	497.824
430.536	5676.88	1943.79	8.62803	15982.2	272.018
794.48	-2343.95	1015.86	26.5988	24143.8	499.606
356.044	9166.84	592.906	16.3429	12213.6	272.018
128.881	4286.13	1988.43	-11.8411	9943.06	499.606
609.972	-11.9323	2147.72	10.4309	-10448.8	272.018
435.435	21683.9	754.533	4.55735	-912.492	499.606
493.65	807.433	818.308	-0.186315	64.3964	272.018
516.283	12827.1	789.875	6.39781	12787.2	377.419
541.379	14298.4	2095.28	-3.23203	10525.3	280.204
91.8411	1150.74	10643.8	-11.9679	-4457.02	16.2777
242.742	275.217	1143.15	10.0022	9822.28	272.018
398.326	9895.95	791.9		6484.32	377.419
898.241	5291.35	649.512		5708.5	272.018
232.735	8358.47	2095.28		6387.4	16.2777
265.944	2864.66	1122.15		9250.82	377.419
349.156	2440.63	7021.43		6252.67	499.606
-25.1899	6563.93	1143.15		-623.354	272.018
291.568	6824.99	1143.15		14950.5	54.4871
56.0321	4149.04	2797.9		4891.25	272.018
1286.2	1464.7	1143.15		4891.25	499.606
251.475	2846.54	1122.15		-3275.68	499.606
641.4	1053.21	1143.15		6531.66	499.606
229.925	3442.02	3485.95		330.614	91.7455
199.364	5729.79	2860.58		292.666	272.018
-109.447	1859	1143.15		370.027	499.606
257.732	787.279	1455.58			272.018
136.07	645.094	2488.33			272.018
252.884	6146.08	1122.15			272.018
75.0329	626.258	10643.8			272.018
-44.3038	5339.25	1455.58			499.606
99.8857	-28.797	791.9			272.018
-8.84739	3563.78	2095.28			272.018
263.263	6226.73	649.512			499.606
72.9898	6584.15	2797.9			499.606
26.6942	4337.25	1143.15			499.606
376.357	13338.7	3485.95			499.606
173.166	2823.48	1418.66			272.018
213.488	8685.56	1122.15			499.606
-138.407	-68.8192	2095.28			499.606
19.5801	-28.797	1122.15			252.374
117.617	1859	1143.15			621.245
42.9969	6584.15	649.512			390.792
20.4441	-28.797	2860.58
482.268	1859	1122.15
146.565	-183.442	10643.8
368.009	12443.1	-401.99
310.523	2051.4	1122.15
99.3893	5414.55	3485.95
-47.6251	6584.15	2095.28
560.511	3563.78	2095.28
67.1412	6584.15	-1316.75
-79.8812	-3016.98	3485.95
158.659	13028.6	2945.12
36.0945	-4116.24	1143.15
-207.673	2051.4	649.512
60.6317	3316.36	1154.27
-38.9997	12188.7	2860.58
209.078	5948.42	649.512
345.605	15671.7	1143.15
29.8506	1053.21	3485.95
82.8798	6584.15	1693.39
-53.9082	-3016.98	1298.75
24.2288	-8296.36	3811.13
268.065	13339.3	3485.95
20.158	2051.4	853.533
118.076	-9361.14	2860.58
36.9505	7922.48	1143.15
205.345	-47.9856	4540.35
-186.423	3316.36	1143.15
423.491	8439.79	1143.15
144.503	5088.54	2860.58
36.5301	3005.66	3601.91
115.122	1604.64	5308.01
-188.744	21299	-401.99
66.143	3005.66	2103.26
87.597	8345.92	6042.3
24.2823	-47.9856	2860.58
321.1	2383.8	2103.26
139.287	3005.66	6042.3
2369.42	1604.64	1143.15
1080.91	7067.12	453.948
-113.097	5088.54	2860.58
382.234	9830.93	4037.38
-60.9203	3572.13	-401.99
310.62	16465.8	2860.58
24.218	2499.54	-401.99
260.354	-2127.54	612.038
348.903	1793.36	2860.58
0.224923	3477.88	5660.3
1088.56	4551.83	2272.33
1799.26	2720.68	5660.3
25.065	376.984	760.311
612.5	-1495.29	5660.3
400.007	-1362.65	5308.01
151.469	2931.87	5660.3
339.741	3132.68	5308.01
155.766	-1313.12	5308.01
327.27	-9246.04	5308.01
31.0069	2789.91	733.777
133.055	2015.75	453.948
154.619	-1799.92	5308.01
118.052	3632.63	612.038
44.8488	702.141	266.931
144.418	4027.1	-100.963
318.378	3916.07	166.892
90.886	3567.2	-19.96
-6.25707	2580.58	-40.2522
185.5	1169.27	-184.89
-72.8512	4392.38	341.714
42.1692	14047.9	428.41
194.735	2764	63.5077
143.962	4278.75	117.204
209.587	-525.385	204.344
443.758	5000.06	449.062
100.705	5000.06	668.191
260.213	1169.27	331.084
538.358	-746.37	120.731
-304.302	5000.06	356.231
67.3779	2833.14	491.042
181.069	8931.85	239.825
-33.4138	5000.06	63.0103
193.945	-4010.85	179.225
144.48	2833.14	167.69
57.2028	2264.17	359.25
630.88	2684.35	11.5121
210.552	3593.4	292.64
-31.1973	-746.37	-227.445
247.814	5000.06	293.451
36.5972	-746.37	214.11
149.621	2905.29	127.449
239.223	4521.48	171.885
-145.747	2684.35	254.867
-318.786	3257.97	0.643881
699.597	2833.14	91.9667
174.226	6143.67	195.971
120.535	2833.14	366.683
52.7624	2684.35	335.103
307.394	6789.45	-5.82948
-21.8848	-746.37	187.102
249.501	1569.65	363.026
-46.0694	-4013.35	156.965
342.496	6665.22	244.673
-151.066	2684.35	26.6889
376.217	-665.479	212.399
77.0942	2490.03	25.0178
-244.668	-746.37	389.59
-18.6831	4142.19	-8.05565
502.819	2684.35	127.449
274.905	6665.22	256.655
200.928	9302.2	0.643881
502.819	1569.65	389.59
1118.4	2684.35	254.867
251.09	5000.06	352.662
283.97	2741.04	254.867
538.184	-665.479	244.673
175.41	5000.06	127.449
459.543	1569.65	212.399
355.266	6665.22	367.424
266.397	12.9937	313.253
-12.013	2490.03	244.673
118.846	3667.9	25.0178
729.723	3667.9	267.942
714.023	2833.14	212.399
130.16	187.06	244.673
-93.7846	1569.65	167.419
282.354	2684.35	136.468
-103.568	1569.65	91.9255
18.6975	1169.27	276.588
134.969	3461.39	203.985
34.8697	5000.06	155.997
340.206	2490.03	390.803
150.336	794.156	61.5353
-15.152	1569.65	244.673
2698.49	1569.65	389.59
288.264	2684.35	15.7289
-365.324	5000.06	9.70418
1526.09	5000.06	-310.58
50.292	1569.65	222.894
35.6501	14652.9	-0.334386
38.5418	-935.936	267.942
149.335	1569.65	-61.5067
92.1351	-20552.6	-135.965
-103.31	-935.936	-124.966
244.294	2490.03	132.875
147.569	994.815	9.50576
1212.77	3236.14	-0.334386
289.811	1236.6	244.673
176.026	647.587	212.055
22.2829	-4717.71	244.673
285.11	-54092.9	94.3698
1367.51	-644.272	183.421
617.076	8085.16	-0.334386
-41.8885	1378.41	124.201
293.726	4383.36	-57.4381
734.666	123.627	136.823
295.121	28169.2	365.823
136.806	1389.73	203.985
330.102	1016.32	15.7289
1174.71	4761.28	113.366
155.802	1355.38	15.7289
45.4748	1389.73	113.366
258.35	1389.73	53.414
353.274	3005.91	-57.4381
-177.31	765.526	-57.4381
333.501	-1945.53	142.807
373.061	2124.78	-217.957
147.796	1294.1	-244.785
84.5188	9221.49	-208.361
337.792	2700.66	-45.6998
129.292	-1794.49	87.9
259.487	1461.73	183.616
108.911	-161.291	219.014
42.6693	1065.12	79.084
33.4057	1233.72	-151.638
6.12659	2525.15	779.253
248.106	2118.38	480.951
415.092	1111.52	209.018
-48.9752	1910.21	232.536
179.977	140.415	-109.917
80.745	-616.703	300.055
206.594	1627.15	731.292
95.5584	-4229.13	367.763
-140.478	1111.52	-255.718
65.4359	1137.44	263.381
87.5781	1277.77	-225.309
14.3166	1627.15	560.475
-141.034	1627.15	508.668
399.577	1627.15	11.467
37.8094	1627.15	770.815
3.85019	1627.15	-157.67
307.685	1627.15	374.558
290.236	2691.48	81.9622
1100.73	1627.15	894.537
243.581	6136.58	-143.361
309.398	1627.15	71.7739
276.846	-2354.96	398.499
38.1434	863.221	29.222
89.4565	1195.33	358.895
-217.791	2691.48	45.3093
114.923	1627.15	-501.014
660.977	1627.15	102.346
-35.5131	3333.66	-143.361
-52.7496	-2354.96	1233.11
15.086	3333.66	859.372
317.234	3333.66	348.542
231.954	-236.893	569.591
5.05278	-2354.96	39.6469
248.267	1366.97	398.644
201.797	1137.44	160.492
126.019	-2354.96	384.883
-311.672	1137.44	184.096
-405.176	1295.87	45.3093
180.362	1195.33	403.095
395.183	659.461	143.483
-49.0621	-2354.96	522.095
440.786	2790.79	350.302
176.88	1195.33	-40.2657
-0.852729	677.369	219.862
118.344	677.369	264.687
-226.913	-2354.96	264.687
90.3555	1240.83	212.085
-73.3223	677.369	159.406
647.679	2335.44	460.414
-411.314	1627.15	630.441
111.326	1125.79	622.477
120.223	1627.15	264.687
107.416	1967.31	213.037
726.395	2691.48	261.657
266.5	169.4	45.3093
-50.5544	150.099	-29.9676
1026.69	131.77	537.237
-55.5463	-10.5741	-380.948
308.774	140.887	-403.479
-236.928	101.609	258.532
165.871	-97.3571	-29.9676
199.032	208.019	261.657
3.02347	-133.964	95.0325
-211.279	-62.7061	60.7142
1809.55	174.606	95.0325
222.429	306.939	277.559
3.65967	-43.6036	381.114
572.032	409.026	-87.8286
2.80699	127.218	399.421
192.224	246.114	264.687
-364.112	501.959	529.39
-110.549	-10.1066	399.421
61.4827	182.44	9.52576
1.19361	184.03	698.236
3.01519	640.835	261.657
0.845857	212.921	501.412
0.266118	331.285	534.832
-2.40265	107.486	-289.434
-6.73382	45.8409	252.743
1.67784	127.967	174.847
2.45044	38.317	10.9061
-2.1508	15.0202	264.687
0.892409	15.0202	264.687
7.99404	208.802	305.255
-2.85419	57.1047	-29.9676
5.77125	215.991	898.588
-2.86836	45.8409	93.3899
-2.32551	331.285	238.141
13.5257	208.802	399.421
6.47455	131.584	278.771
-10.006	215.991	127.001
-1.13882	45.8409	252.743
13.8644	31.8653	399.421
4.18317	45.8409	382.353
8.8074	208.802	348.542
5.01557	31.8653	461.972
12.5203	38.317	288.058
5.5061	331.285	236.495
10.5267	45.8409	1023.44
11.4077	45.8409	311.681
22.5573	45.8409	240.271
4.26282	208.802	310.863
19.073	208.802	149.344
23.0914	215.991	-482.303
5.25147	215.991	213.037
13.4945	31.8653	399.421
-1.09733	31.8653	211.795
-0.9004	103.76	300.185
1.63317	177.112	201.305
0.511578	15.0202	399.421
-13.9453	45.8409	43.9832
0.291431	215.991	348.542
2.40612	45.8409	210.745
10.2146	208.802	408.245
2.18933	45.8409	212.085
-3.55186	-166.422	45.3093
6.19974	15.0202	276.128
2.82355	273.21	399.421
4.05776	31.8653	348.542
7.5735	330.614	114.173
6.75181	331.285	30.9135
7.2437	330.614	204.052
0.581271	292.666	399.421
0.963291	-47.3074	1797.36
5.94072	67.173	261.739
8.47675	-166.422	45.3093
7.06124	215.991	552.828
1.89729	45.8409	461.624
7.77327	103.76	252.743
5.07108	208.802	584.319
-5.54835	131.584	212.085
19.4049	208.802	179.888
-0.790255	215.991	144.121
7.37912	-46.7136	308.865
17.6643	330.614	212.085
1.25328	31.8653	176.088
-1.28313	331.285	261.739
1.23257	330.614	364.215
-0.906408	208.802	235.023
2.74146	331.285	302.212
-5.24155	541.938	212.085
11.4856	208.802	174.847
-3.26836	45.8409	261.657
3.44335	331.285	21.0963
-8.68225	330.614	352.032
-0.202881	-166.422	218.827
-3.01217	45.8409	821.683
9.9758	51.8642	212.085
20.5044	-47.3074	302.247
0.00147489	223.758	324.077
6.58076	208.802	262.984
14.2063	51.8642	212.085
9.65177	45.8409	200.899
-3.23486	215.991	179.888
0.584256	331.285	299.807
-1.03133	330.614	262.984
-9.41928	5.45321	235.023
-3.14904	-19.3785	213.886
7.88039	45.8409	389.135
-3.14904	306.33	212.085
4.12279	15.0202	218.827
2.07922	273.21	179.888
5.3957	-47.3074	218.827
-1.4167	215.991	262.984
-2.00673	208.802	212.085
1.82983	-47.3074	261.739
3.42165	223.758	179.888
0.513257	-19.3785	226.429
4.68391	330.614	1065.76
2.81226	31.8653	344.922
16.1056	97.3743	261.657
9.37039	-7.70732	302.212
3.76298	208.802	389.135
24.2478	215.991	261.739
-2.2629	-7.70732	179.888
3.1259	-19.3785	352.032
2.45888	273.21	302.212
2.23628	51.8642	261.657
1.68668	15.0202	311.492
6.78371	208.802	218.827
1.17289	51.8642	302.212
13.2211	31.8653	179.888
-7.18055	15.0202	235.023
3.0528	45.8409	-184.462
-3.88838	331.285	249.827
-1.11609	51.8642	52.7051
3.35197	215.991	-31.3792
5.8471	208.802	234.614
16.5525	273.21	329.079
4.08785	330.614	-312.749
-4.74963	76.8064	-103.187
-2.68519	208.802	351.815
14.0172	31.8653	376.809
23.8985	116.913	437.428
2.69901	131.584	368.43
1.60064	-7.70732	-48.5203
6.22105	215.991	429.633
39.2493	76.8064	468.448
12.4885	45.8409	9.99786
-2.55144	15.0202	556.006
4.7444	330.614	456.471
-4.05993	-47.3074	457.571
7.1585	-121.321	254.755
5.96745	-38.0438	22.7251
-1.41954	-114.849	501.972
-3.42857	15.473	254.755
23.0945	-53.4968	895.749
0.894899	100.725	415.113
13.7035	-668.774	627.781
23.4473	34.0251	22.7251
1.44623	-24.1852	215.949
7.54391	-0.314606	415.113
13.0578	41.3495	221.283
13.0628	-29.8732	151.281
4.31736	85.6426	71.4461
-0.75025	178.062	207.895
7.63024	120.349	254.755
1.35215	86.2772	117.323
1.86873	181.746	145.095
3.90273	64.0717	63.1379
40.4562	163.257	254.755
22.4933	161.899	9.99786
7.73125	47.5337	-503.048
9.8704	20.2217	268.748
0.860503	47.5337	526.682
14.1511	473.15	9.99786
1.30789	137.72	704.589
7.20102	306.612	192.291
32.8148	127.148	4.51506
4.06028	210.221	254.755
1.38646	123.811	410.937
18.3569	176.915	698.473
-3.3648	3.92498	718.104
0.776359	-98.2205	704.589
-9.30092	267.802	144.113
11.2884	64.0717	71.4461
-1.00119	123.811	226.09
5.55213	209.008	246.392
2.57931	38.6899	86.1273
7.4254	307.635	704.589
13.8058	353.067	71.4461
4.91614	123.811	943.685
2.99366	-3.89137	376.361
2.61095	47.5337	698.473
2.54073	121.635	487.748
16.2953	38.5259	183.796
8.32455	0.784293	391.017
12.2128	279.254	71.4461
2.57289	47.5337	396.129
34.1734	176.915	423.117
12.0062	38.5259	47.959
-1.77673	176.915	9.99786
5.83952	-53.1979	207.895
6.52933	251.36	339.943
17.9772	38.5259	207.895
4.26564	100.171	339.943
5.04935	47.5337	512.032
44.438	47.5337	583.727
7.9739	142.983	124.289
12.2355	47.5337	9.99786
-3.10462		339.943
3.57886		207.895
2.41987		339.943
5.44206		207.895
2.10354		423.117
7.37311		273.181
14.9528		-92.0066
12.9145		512.032
6.56169		500.355
5.5965		423.117
25.7672		268.748
26.0108		57.9747
25.5067		339.943
29.28		279.78
19.1217		57.9747
-1.85632		268.748
10.745		57.9747
12.0186		512.032
24.1838		464.695
30.1211		9.99786
5.03164		1185.73
14.841		162.913
6.2033		268.748
20.0078		268.748
33.7574		464.695
9.53258		57.9747
-1.2446		268.748
4.07643		156.973
-6.04755		57.9747
0.402022		134.885
5.40908		9.70534
1.7183		57.9747
-6.91524		9.99786
4.72023		57.9747
7.54862		57.9747
4.88053		423.117
4.79534		187.857
20.8962
-7.70437
10.6974
-5.20201
2.5205
20.508
6.04986
7.04257
9.17416
1.17241
21.3165
1.8751
0.670546
8.28885
14.0924
3.22862
-0.793911
-14.0475
1.75947
8.54493
11.5505
4.68467
2.06889
4.92935
0.506291
10.2163
12.2984
16.5377
5.68916
23.1008
14.0117
13.1817
9.52101
12.4049
5.69343
-1.43614
-6.45244
-9.92464
9.8465
51.0536
5.57385
24.9871
1.78266
1.95481
24.9113
-7.40663
6.49456
37.4809
-10.9084
30.2071
2.40109
32.8605
-0.87686
2.66929
7.72097
4.51458
-5.22227
10.7181
4.11177
4.62681
2.39873
-8.37206
-1.48366
2.67997
-10.3416
1.67792
11.3979
-3.97226
31.3198
14.3084
-5.64151
-8.98865
16.4954
-10.3397
-4.30005
8.2713
-11.7809
-11.872
1.27596
14.9495
0.0993977
-3.87412
6.40551
-0.903121
6.52415
-1.55923
8.75308
-3.95305
3.02507
4.71683
15.8092
-18.1202
12.9771
7.88543
13.7225
23.324
1.78459
1.08367
-1.8773
8.89094
11.4901
4.57068
2.01673
1.08187
1.77813
5.04035
6.58433
3.68589
2.50759
8.6729
7.4709
1.47499
3.66838
4.76459
3.33958
14.9288
-1.9977
6.38531
14.3953
9.30324
15.5737
3.53267
2.57573
11.7982
1.37345
42.0116
21.1804
4.37774
1.06112
2.87575
16.2457
-4.39813
4.62049
2.43595
4.75796
58.5902
-1.48199
-0.00900524
-0.689406
7.80082
4.54963
-4.30838
-1.38188
-3.20515
3.62987
9.84282
-5.81927
-0.511089
16.6776
19.504
-3.12112
6.9497
2.85689
17.7927
3.97408
9.679
15.32
3.78579
31.9094
5.93743
-2.77169
1.81023
9.1102
-0.2844
-0.170872
3.85277
3.03375
0.756464
8.23199
-0.533778
2.9638
1.17887
18.514
7.75226
12.0734
-2.58455
0.193643
19.0761
10.3527
-12.5541
-2.45911
-0.870644
3.74073
2.63437
12.8822
22.7693
1.42815
3.19873
-6.57599
1.741
7.05199
9.7229
9.27449
12.5566
25.4546
-5.85211
6.07025
-3.1621
2.5244
-2.18398
-2.62538
27.998
3.2456
12.2628
1.6532
-7.68967
2.37374
1.20882
0.897915
3.48696
-5.33157
3.52986
5.59378
5.13099
-10.2457
5.33452
-7.27847
-9.14299
1.92238
12.1889
-3.10303
0.443776
-2.52519
1.71999
-12.3902
11.8802
9.18226
12.1919
5.00627
7.73432
25.8292
7.44601
5.14144
27.1211
20.5369
30.3058
19.4266
17.2038
-4.12994
6.58358
10.9276
23.8958
11.876
-2.24726
11.2828
-0.669562
-3.24436
0.524668
-1.50828
-0.600699
-3.86135
2.86031
-1.13198
16.5848
8.85528
-3.74777
2.3168
0.199436
-16.003
2.86355
1.92475
29.3001
-8.21609
21.6644
1.43614
10.0708
15.6793
15.4427
5.12202
