# Supplementary material for: Pre-complexation of talin and vinculin without tension is required for efficient nascent adhesion maturation
Source: eLife. 2021 Mar 30;10:e66151. doi: 10.7554/eLife.66151 (PMC8009661; doi:10.7554/eLife.66151)
Supplement: Figure 3—source data 2. [file elife-66151-fig3-data2.xlsx]

## Sheet: Sheet1
Row	Median (Pa)	Upper Adjacent Value	Lower Adjacent Value	Upper Whisker	Lower Whisker	Outlier_ 1	Outlier_ 2	Outlier_ 3	Outlier_ 4	Outlier_ 5	Outlier_ 6	Outlier_ 7	Outlier_ 8	Outlier_ 9	Outlier_10	Outlier_11	Outlier_12	Outlier_13	Outlier_14	Outlier_15	Outlier_16	Outlier_17	Outlier_18	Outlier_19	Outlier_20	Outlier_21	Outlier_22	Outlier_23	Outlier_24	Outlier_25	Outlier_26	Outlier_27	Outlier_28	Outlier_29	Outlier_30	Outlier_31	Outlier_32	Outlier_33	Outlier_34	Outlier_35	Outlier_36	Outlier_37	Outlier_38	Outlier_39	Outlier_40	Outlier_41	Outlier_42	Outlier_43	Outlier_44
Tal_G1(N=785)	0.113831	2.02384	-2.62674	1.13535	-2.62674	-11.3679	-5.8377	-3.49408	3.94222	6.96173	19.7718
Tal_G2(N=16)	-3.1171	3.74048	-5.8377	0.541807	-5.8377	-18.6313	5.46644
Vin_G1(N=479)	0.294814	9.34646	-8.03888	4.16312	-8.03888	-307.853	-73.3721	-35.5486	-33.3138	-27.9461	-22.9501	-22.9045	-21.0025	-19.8726	-17.5799	-16.8308	-16.3269	-16.2205	-15.6185	-14.8267	-14.2286	-13.465	-12.6643	-12.1845	-11.3679	-11.199	-11.1916	-10.7915	-10.7355	-10.2936	-9.87394	-9.6472	-9.51098	-9.40736	-9.04676	-8.98642	-8.77616	-8.41426	-8.18076	-8.13209	-8.0787	9.5748	9.69968	9.72222	9.85913	10.2247	10.5922	11.2671	12.0224
Vin_G2(N=30)	0.0715551	10.1079	-9.94765	4.26372	-9.94765	-32.0378	-29.1548	-26.0369	-21.5741	-19.23	-18.6313	-18.4229	-15.9762	-15.2287	-15.1865	-15.0377	-13.1907	-13.0836	-11.5033	-11.1902	10.8228	10.9035	11.3536	12.2943	16.0537	20.2498	26.1079	27.6102	31.3055	31.3352	32.791	32.9975	33.6086	198.652
Pax_G1(N=516)	0.051575	1.00647	-0.864546	0.431203	-0.864546	-20.4361	-18.4543	-13.6171	-13.6171	-11.1984	-9.63791	-9.63791	-9.18331	-8.15943	-7.85903	-7.3542	-7.09855	-6.40083	-5.35119	-5.25605	-4.74329	-3.84004	-3.46379	-3.17184	-3.14138	-3.14138	-3.13756	-3.13756	-3.0785	-2.85857	-2.85857	-1.99285	-1.92841	-1.75586	-1.70365	-1.66131	-1.58029	-1.34046	-1.29905	-1.2033	-1.15129	-1.06416	1.0747	1.0747	1.2462	1.2462	1.34312	1.42531	1.52872
Pax_G2(N=47)	0.0167915	3.85928	-1.75586	2.22827	-1.75586	-30.0888	-27.561	-24.4176	-17.5825	-13.3158	-11.9977	-9.05175	-7.3779	-5.84622	-4.09274	-3.62225	-3.46379	5.08024	6.85261	8.72583	10.7229	11.1576	13.1292	15.156	20.4458	22.2958	24.615	31.0213	37.4446
[truncated: 42 more columns]
