# Supplementary material for: Pre-complexation of talin and vinculin without tension is required for efficient nascent adhesion maturation
Source: eLife. 2021 Mar 30;10:e66151. doi: 10.7554/eLife.66151 (PMC8009661; doi:10.7554/eLife.66151)
Supplement: Figure 3—source data 3. [file elife-66151-fig3-data3.xlsx]

## Sheet: Sheet1
Row	Median (Pa)	Upper Adjacent Value	Lower Adjacent Value	Upper Whisker	Lower Whisker	Outlier_ 1	Outlier_ 2	Outlier_ 3	Outlier_ 4	Outlier_ 5	Outlier_ 6	Outlier_ 7	Outlier_ 8	Outlier_ 9	Outlier_10	Outlier_11	Outlier_12	Outlier_13	Outlier_14	Outlier_15	Outlier_16	Outlier_17	Outlier_18	Outlier_19	Outlier_20	Outlier_21	Outlier_22	Outlier_23
Tal_G1(N=785)	-0.000845127	0.277824	-0.0864331	0.208157	-0.0864331
Tal_G2(N=16)	0.551298	2.13999	0.010251	1.46185	0.010251
Vin_G1(N=479)	0.0476224	0.403378	-0.24186	0.206456	-0.24186	-6.47555	-1.44515	-1.28178	-0.671444	-0.653194	-0.448633	-0.305602	0.430669	0.489201	0.505776	0.512225	0.583181	0.631126	1.07984	1.12593	1.35439
Vin_G2(N=30)	0.152002	0.689749	-0.330144	0.39325	-0.330144	-2.87442	-0.573678	-0.461774	-0.460172	-0.460172	-0.449929	-0.396965	-0.342478	-0.340645	0.735702	0.75007	0.783714	0.797892	0.809621	0.825179	0.926834	1.05256	1.07279	1.43568	1.56409	2.13999	2.50779	4.01439
Pax_G1(N=516)	0.0306489	0.146804	-0.0566783	0.114585	-0.0566783	-1.66412	-0.153008	-0.15056	-0.15056	0.23051	0.284231	0.293084	0.377379	0.390199	0.390199	0.448646	0.541378	0.68171	0.782184	0.877091	1.00708	1.04929	1.05062	1.05062
Pax_G2(N=47)	0.27298	1.71965	0.00842102	1.02993	0.00842102	2.48716	2.64211
