# Supplementary material for: Pre-complexation of talin and vinculin without tension is required for efficient nascent adhesion maturation
Source: eLife. 2021 Mar 30;10:e66151. doi: 10.7554/eLife.66151 (PMC8009661; doi:10.7554/eLife.66151)
Supplement: Figure 5—source data 1. [file elife-66151-fig5-data1.xlsx]

## Sheet: Sheet1
R8vvv-mNG	WT-talin1
12.3985	17.3367
12.3999	17.2748
12.3944	17.2754
12.3831	17.2339
12.4217	17.1877
12.4	17.1692
12.4177	17.1678
12.3939	17.1941
12.3782	17.1294
12.3731	17.1328
12.4068	17.1336
12.3709	17.1348
12.3598	17.058
12.3652	17.0776
12.379	17.0719
12.3665	17.0461
12.3671	17.035
12.3597	17.0172
12.3607	17.0124
12.3463	16.9574
12.3622	16.9396
12.3614	16.9509
12.3795	16.9454
12.3453	16.9098
12.3415	16.8962
12.3293	16.9072
12.3535	16.9048
12.3357	16.8738
12.3597	16.8759
12.332	16.8663
12.3278	16.8564
12.2952	16.8664
12.3036	16.8449
12.2921	16.8378
12.2852	16.8248
12.2834	16.7892
12.2776	16.7916
12.2898	16.7776
12.2675	16.7521
12.2602	16.7479
12.2541	16.7632
12.256	16.7196
12.2658	16.7395
12.2673	16.701
12.2749	16.6964
12.2907	16.6698
12.2799	16.6622
12.2867	16.6477
12.2903	16.637
12.3007	16.611
12.281	16.5982
12.3205	16.5926
12.2724	16.5735
12.251	16.5683
12.2665	16.5661
12.2442	16.5694
12.2133	16.5403
12.1723	16.5046
12.2065	16.5037
12.1777	16.4844
12.177	16.4826
12.1898	16.4628
12.1841	16.448
12.1659	16.4632
12.1825	16.42
12.1799	16.4187
12.1805	16.4114
12.1789	16.3908
12.191	16.3505
12.1718	16.351
12.1596	16.3406
12.1309	16.3205
12.1348	16.3046
12.1711	16.3108
12.1279	16.2877
12.1386	16.2665
12.113	16.2764
12.125	16.2412
12.108	16.2166
12.1244	16.2096
12.0909	16.1956
12.0913	16.1503
12.0812	16.1688
12.1145	16.126
12.0731	16.1242
12.1035	16.0998
12.1034	16.0623
12.1168	16.0569
12.1086	16.0489
12.0858	16.0597
12.069	16.0494
12.0452	16.0333
12.0441	16.0345
12.0277	15.9887
12.0324	16.0165
12.0075	16.0348
12.0413	16.0003
12.0401	15.9711
12.01	15.9667
12.0169	15.9588
11.9858	15.9348
11.9845	15.9238
11.9873	15.9102
11.977	15.8932
11.948	15.8837
11.9558	15.8752
11.938	15.8641
11.9246	15.8431
11.926	15.803
11.9693	15.8142
11.9384	15.7989
11.9518	15.7998
11.9312	15.7809
11.921	15.7661
11.9001	15.741
11.8927	15.7306
11.8735	15.7227
11.8552	15.6885
11.8493	15.6906
11.849	15.6637
11.8186	15.6553
11.777	15.635
11.7943	15.6059
11.7931	15.6081
11.8042	15.5873
11.7967	15.5825
11.8027	15.5936
11.7798	15.5764
11.7713	15.5556
11.7625	15.5329
11.7475	15.5066
11.7379	15.5087
11.7269	15.4909
11.7225	15.4649
11.7154	15.4911
11.7386	15.4368
11.748	15.4313
11.754	15.4384
11.7323	15.4083
11.7526	15.4087
11.7203	15.3904
11.7253	15.3651
11.7314	15.3659
11.7037	15.3522
11.6973	15.3138
11.6895	15.3288
11.6514	15.3049
11.653	15.2759
11.6435	15.2794
11.6456	15.2531
11.6194	15.2486
11.6632	15.2165
11.651	15.1966
11.6442	15.1954
11.6211	15.1784
11.6013	15.1408
11.5873	15.1487
11.599	15.141
11.5704	15.1214
11.5702	15.0986
11.5666	15.0701
11.5856	15.0949
11.5821	15.0709
11.5903	15.0473
11.5846	15.054
11.5735	15.0423
11.5497	15.02
11.5522	14.9984
11.528	14.9782
11.5336	14.9668
11.49	14.9629
11.479	14.9499
11.4821	14.9127
11.4648	14.9143
11.4266	14.8932
11.4425	14.8716
11.4093	14.8859
11.3232	14.8358
11.3193	14.8449
11.2788	14.8202
11.2734	14.803
11.3176	14.7909
11.2409	14.7582
11.2625	14.7674
11.2132	14.7525
11.2279	14.705
11.1958	14.6887
11.2124	14.6713
11.1798	14.6761
11.1745	14.6703
11.155	14.6302
11.1427	14.6055
11.1203	14.6169
11.1475	14.5828
11.1174	14.5949
11.1236	14.58
11.108	14.5669
11.0723	14.5585
11.0491	14.5228
11.0497	14.5072
11.03	14.5207
11.0016	14.5149
10.9906	14.4649
10.9961	14.4653
10.9858	14.4505
10.9903	14.4481
10.9471	14.4254
10.929	14.4063
10.9258	14.3978
10.9224	14.3592
10.8756	14.3736
10.8777	14.3355
10.8568	14.3564
10.8611	14.346
10.8439	14.3128
10.8632	14.2912
10.8606	14.2899
10.8353	14.2829
10.8378	14.2725
10.8443	14.2507
10.8187	14.2415
10.8042	14.2156
10.7774	14.2081
10.7768	14.1918
10.7477	14.1577
10.7151	14.1584
10.7065	14.1663
10.7061	14.1332
10.7121	14.1293
10.7175	14.1071
10.6813	14.0807
10.7187	14.0774
10.6615	14.0487
10.6418	14.0486
10.6362	14.0253
10.6324	14.0131
10.6109	14.0026
10.5732	13.9892
10.5795	13.9487
10.5806	13.9685
10.5762	13.9358
10.5883	13.9147
10.5676	13.8938
10.5704	13.8823
10.5436	13.8722
10.5388	13.8618
10.4995	13.8518
10.5191	13.8487
10.5029	13.809
10.4966	13.824
10.4812	13.8033
10.4581	13.7808
10.4306	13.78
10.4277	13.7615
10.4222	13.7307
10.4431	13.7268
10.4163	13.7104
10.4261	13.6822
10.3894	13.6867
10.3883	13.642
10.3652	13.6368
10.3468	13.6311
10.3435	13.6186
10.3408	13.5952
10.327	13.5898
10.3124	13.5671
10.3028	13.5524
10.3054	13.5349
10.2695	13.5439
10.274	13.521
10.2435	13.508
10.2673	13.4974
10.2593	13.4553
10.2683	13.4531
10.2337	13.4475
10.2555	13.4194
10.2155	13.418
10.2409	13.3918
10.2194	13.3883
10.2112	13.3933
10.1689	13.3416
10.18	13.3256
10.1525	13.3203
10.1469	13.3253
10.1242	13.3264
10.1153	13.2907
10.0879	13.2735
10.1162	13.2899
10.0863	13.2647
10.0712	13.2378
10.0492	13.2375
10.0547	13.2426
10.0279	13.23
10.0173	13.2196
10.0233	13.2013
10.043	13.1814
10.0272	13.1974
10.0123	13.1621
9.99915	13.1566
10.0159	13.1438
9.99225	13.1185
21.6446	13.1026
21.5789	13.0998
21.5207	13.0803
21.4977	13.047
21.4744	13.0393
21.4788	13.0227
21.4728	13.0357
21.4516	13.0189
21.4157	12.9808
21.3672	12.9804
21.4406	12.9597
21.4169	12.9403
21.3861	12.9417
21.4033	12.9063
21.3804	12.8994
21.3714	12.8854
21.3071	12.8848
21.3631	12.863
21.316	12.8524
21.275	12.8411
21.3319	12.8304
21.3233	12.8435
21.2564	12.837
21.2304	12.8118
21.2298	12.7953
21.1831	12.7949
21.1919	12.7464
21.1125	12.7301
21.1401	12.7165
21.0974	12.687
21.0656	12.6832
20.9982	12.6773
21.0218	12.6492
20.9437	12.6451
20.9984	12.6229
20.9452	12.628
20.9274	12.5947
20.9381	12.5958
20.8852	12.5859
20.8847	12.5792
20.7951	12.5738
20.8135	12.5403
20.8273	12.5447
20.7602	12.5561
20.7104	12.5376
20.6947	12.5196
20.6618	12.4899
20.5845	12.485
20.6273	12.4837
20.5921	12.4677
20.6257	12.4241
20.6309	12.4062
20.5874	12.4273
20.5722	12.4017
20.5385	12.3842
20.5288	12.36
20.5055	12.3389
20.4511	12.3222
20.4395	12.3202
20.4339	12.2972
20.3982	12.2792
20.3807	12.2732
20.3545	12.2491
20.3454	12.248
20.3555	12.2431
20.3266	12.2123
20.3363	12.1898
20.2569	12.1826
20.1721	12.1677
20.1828	12.1589
20.2157	12.1164
20.1717	12.0954
20.1402	12.0798
20.1315	12.0759
20.1317	12.0489
20.1151	12.0341
20.1128	12.0572
20.1028	12.0062
20.0809	12.0226
20.0294	11.9894
20.0491	11.9708
20.008	11.9425
19.9778	11.9404
19.9629	11.923
19.9499	11.9008
19.8716	11.8937
19.9033	11.8816
19.8379	11.8677
19.845	11.8326
19.8357	11.8356
19.8141	11.8104
19.7199	11.8108
19.7671	11.7902
19.7235	11.7807
19.7264	11.7594
19.6332	11.7102
19.6231	11.7408
19.5425	11.7143
19.5413	11.6981
19.4551	11.6751
19.5306	11.6417
19.5164	11.6093
19.4858	11.6348
19.3878	11.6049
19.4029	11.5758
19.363	11.5791
19.3527	11.5866
19.2836	11.529
19.3635	11.5302
19.3918	11.5382
19.3476	11.4877
19.2986	11.4686
19.2676	11.4645
19.2725	11.4521
19.229	11.4442
19.2317	11.4212
19.2452	11.4014
19.1233	11.3777
19.1294	11.3622
19.1311	11.3612
19.095	11.3422
19.0402	11.3349
19.0819	11.3265
19.0533	11.3211
19.0388	11.2998
18.9757	11.2732
18.9614	11.283
18.9511	11.2785
18.9536	11.247
18.9164	11.2195
18.8698	11.225
18.8431	11.2142
18.891	11.1991
18.8539	11.1862
18.8581	11.1773
18.7975	11.1575
18.7476	11.1335
18.7632	11.1398
18.758	11.1004
18.6983	11.0979
18.7074	11.0849
18.6443	11.0578
18.6553	11.0588
18.6065	11.0445
18.6375	11.0317
18.5716	11.0398
18.5858	11.0381
18.5159	11.0481
18.5377	11.0185
18.4949	11.0327
18.4984	23.2475
18.4477	23.2154
18.4438	23.162
18.4264	23.1335
18.408	23.0889
18.3787	23.0652
18.3582	23.0644
18.3344	23.0329
18.3469	22.982
18.3172	22.9696
18.2836	22.9769
18.2821	22.982
18.2751	22.8436
18.2308	22.8125
18.2563	22.8629
18.1526	22.8675
18.1434	22.7603
18.1471	22.8284
18.1337	22.7681
18.0978	22.7976
18.0909	22.7081
18.0231	22.6974
17.9895	22.6125
18.0145	22.6179
17.9479	22.6491
17.9574	22.5144
17.9472	22.4695
17.9351	22.4983
17.9367	22.5068
17.8939	22.5557
17.8837	22.4449
17.7903	22.3733
17.8016	22.2738
17.7831	22.432
17.8068	22.4142
17.7801	22.2196
17.7375	22.3607
17.7055	22.2895
17.7106	22.1691
17.6922	22.3468
17.6388	22.1008
17.6635	22.1233
17.5896	22.1793
17.5419	22.0825
17.5517	22.2238
17.537	22.0268
17.4996	22.0645
17.4835	21.9778
17.4678	22.0989
17.4253	21.9058
17.4171	23.1953
17.3632	21.7726
17.3482	22.9834
17.2829	22.9723
17.2737	21.6631
17.2416	22.8655
17.2587	21.6761
17.198	21.7254
17.2145	21.6134
17.2067	21.6039
17.0986	21.5988
17.0768	21.5613
17.1203	21.5541
17.0693	21.4991
17.0354	21.5329
16.9779	21.5143
16.9588	21.5348
16.9483	21.6044
16.9386	21.5777
16.9296	21.4356
16.9133	21.3734
16.8734	21.4707
16.8264	21.3864
16.8244	20.9444
16.7676	20.9644
16.7138	20.9416
16.716	20.954
16.7181	20.9137
16.6707	20.9126
16.63	20.9043
16.6316	20.9003
16.6192	20.895
16.5113	20.8573
16.5015	20.836
16.5112	20.7915
16.4856	20.7907
16.4725	20.7678
16.4138	20.7873
16.3726	20.7689
16.3574	20.7362
16.3315	20.7054
16.3033	20.6994
16.2963	20.6665
16.2695	20.6686
16.2406	20.6076
16.2251	20.6073
16.1799	20.5796
16.1608	20.6039
16.1508	20.541
16.0964	20.53
16.1205	20.504
16.0799	20.4411
16.0425	20.4022
16.0284	20.4202
16.016	20.4138
15.9664	20.3973
15.9355	20.3825
15.9072	20.3237
15.8723	20.3736
15.8817	20.3138
15.8881	20.2541
15.8315	20.2668
15.8086	20.2781
15.7877	20.2412
15.7508	20.2769
15.723	20.2329
15.6966	20.2007
15.7053	20.1605
15.6546	20.1152
15.6164	20.1052
15.5823	20.0536
15.5821	20.0329
15.5551	20.0053
15.4893	20.0308
15.4562	19.9763
15.449	19.9855
15.4184	19.9745
15.3762	19.9252
15.353	19.9213
15.2973	19.8954
15.3012	19.8755
15.2737	19.8644
15.2393	19.8205
15.2055	19.8103
15.1634	19.7703
15.1569	19.7394
15.1302	19.7306
15.1235	19.7247
15.0969	19.6787
15.0466	19.7097
15.0295	19.6975
15.0119	19.6497
14.962	19.6107
14.9553	19.5795
14.9314	19.5756
14.913	19.5606
14.8932	19.565
14.9035	19.5352
14.9124	19.5175
14.8912	19.4742
14.9287	19.4474
33.678	19.4378
33.6472	19.4222
33.2014	19.4178
33.3071	19.3863
33.0469	19.3766
33.0193	19.3268
33.0988	19.3283
33.0971	19.2855
32.8327	19.2759
32.7147	19.2615
32.7249	19.2454
32.5022	19.2201
32.5575	19.2072
32.5985	19.1591
32.4466	19.1599
32.277	19.1317
32.3031	19.1129
32.1171	19.094
32.0378	19.0721
32.1119	19.0454
32.1288	19.0472
32.0632	18.9833
31.9208	18.9774
31.9852	18.9538
31.8043	18.9387
31.6074	18.9272
31.7736	18.9047
31.7489	18.8536
31.5444	18.8412
31.6023	18.8198
31.5119	18.7894
31.4053	18.7821
31.3137	18.767
31.4037	18.7601
31.2387	18.7163
31.1105	18.6777
31.0903	18.6665
31.032	18.6383
30.9712	18.6163
30.8552	18.6356
30.8153	18.5955
30.8913	18.5684
30.7766	18.5527
30.7419	18.5411
30.7706	18.5198
30.598	18.4929
30.4619	18.4933
30.6112	18.4519
30.4085	18.4213
30.4292	18.4307
30.265	18.3992
30.1641	18.3716
30.1675	18.3559
30.082	18.3501
30.0649	18.3248
30.0444	18.3129
30.0096	18.259
29.852	18.2454
29.912	18.237
29.7859	18.2251
29.7988	18.1813
29.6282	18.1741
29.6035	18.1699
29.4946	18.135
29.4735	18.1204
29.3895	18.0991
29.4285	18.0873
29.2933	18.0917
29.2138	18.0541
29.0907	18.0303
29.0564	18.0231
29.1537	18.0151
29.0991	18.0113
29.056	17.9532
28.8602	17.9428
28.7817	19.2126
28.8543	17.8098
28.765	17.7898
28.6976	17.7596
28.636	19.1325
28.5755	19.1077
28.5024	17.6771
28.4048	19.0286
28.2609	17.6345
28.2098	19.0083
28.2153	18.9789
28.1097	17.6087
28.1221	18.8995
27.9847	18.9205
27.9617	18.8501
27.911	18.8409
27.8133	18.824
27.778	18.7877
27.7211	18.75
27.7291	18.7359
27.5987	18.7226
27.4902	18.6949
27.5425	18.6739
27.4431	18.653
27.3442	18.6082
27.2961	18.5963
27.2326	18.5583
27.1614	18.529
27.03	18.5122
27.0962	18.4803
26.9186	18.4661
26.8853	18.4363
26.8272	18.3994
26.7696	18.3665
26.739	18.3359
26.6064	18.2946
26.5291	18.2584
26.4859	18.3018
26.4309	18.2794
26.3339	18.205
26.3085	18.153
26.2123	18.127
26.2332	18.1015
26.1016	18.0761
26.0516	18.0265
26.0154	18.0323
25.7887	18.0007
25.7861	17.9647
25.7152	17.9422
25.7351	17.9269
25.6291	17.8843
25.5416	17.8592
25.5684	17.8465
25.4252	17.7994
25.2777	17.7766
25.32	17.7606
25.1967	17.7187
25.0868	17.6858
25.1091	17.6828
24.974	17.6656
25.0355	17.6146
24.8838	17.5742
24.7979	17.5459
24.7876	17.5452
24.695	17.53
24.6132	17.4948
24.547	17.4822
24.4908	16.2325
24.3823	16.2202
24.3693	16.2176
24.2936	16.2001
24.2254	16.1674
24.1262	16.1697
24.0781	16.15
24.1343	16.1396
24.029	16.1086
23.934	16.1101
23.8135	16.0834
23.8341	16.046
23.76	16.0264
23.6917	16.0325
23.6209	15.9803
23.5927	15.9698
23.4953	15.9522
23.4653	15.9476
23.3266	15.9198
23.3027	15.8807
23.2263	15.8402
23.1657	15.843
23.1447	15.8152
22.9951	15.8046
22.9987	15.7618
22.8514	15.7592
22.8331	15.7432
22.721	15.7111
22.7204	15.685
22.5619	15.6882
22.531	15.6478
22.4825	15.6435
22.4198	15.6193
22.299	15.5962
22.3207	15.5777
22.1867	15.5389
22.1609	15.5275
21.9841	15.5139
22.0239	15.4783
21.9056	15.4607
21.8506	15.4421
21.8146	15.4429
21.6826	15.4019
21.6859	15.3998
21.5713	15.3512
21.4463	15.3411
21.3442	15.3179
21.3223	15.3002
21.2203	15.2777
21.1671	15.2822
21.0995	15.2548
20.9575	15.2284
20.9897	15.196
20.9793	15.1918
20.8169	15.1781
20.8703	15.1505
20.7163	15.1081
20.719	15.1135
20.5896	15.095
20.5761	15.0807
20.3876	15.0616
20.4649	15.048
20.2439	15.0222
20.2704	15.0034
20.116	14.9616
20.0926	14.9712
20.0045	14.9445
19.9139	14.9087
19.8813	14.9034
19.7738	14.8935
19.7695	14.8611
19.6064	14.8404
19.584	14.8201
19.4785	14.8148
19.43	14.7852
19.3343	14.7557
19.2515	14.7312
19.1805	14.7021
19.1433	14.6886
19.0397	14.6712
18.9901	14.6462
18.9861	14.6212
18.8375	14.573
18.8038	14.5769
18.6857	14.5656
18.638	14.5346
18.5793	14.4925
18.5409	14.5018
18.3761	14.4811
18.4297	14.4479
18.2644	14.4301
18.2292	14.4054
18.1538	14.3709
18.0779	14.3598
18.0502	14.3427
17.9488	14.3094
17.8566	14.3072
17.744	14.2678
17.7816	14.2663
17.6639	14.2268
17.5702	14.2083
17.5188	14.1887
17.4518	14.1621
17.3803	14.143
17.2592	14.1125
17.252	14.0993
17.1789	14.078
17.1434	14.0793
17.0756	15.0103
16.986	13.9456
16.9458	13.903
16.8759	13.8891
16.8395	13.8633
16.7693	13.8494
16.6665	13.8004
16.6968	13.8125
16.5669	13.7962
16.5191	13.7745
16.4218	13.7431
16.3085	13.7381
16.2787	13.7008
16.1597	13.6876
16.1122	13.6565
16.0801	13.6453
15.9441	13.6106
15.8844	13.5994
15.7898	13.5563
15.7116	13.5521
15.629	13.5292
15.6221	13.5038
15.4964	13.4971
15.4256	13.4716
15.346	13.4413
15.3165	13.4523
15.2285	13.408
15.1667	13.3901
15.0899	13.363
14.9741	13.329
14.9536	13.305
14.8704	13.3056
14.7812	13.2719
14.7678	13.2748
14.6498	13.2354
14.6142	13.2204
14.5187	13.192
14.4124	13.1972
14.3714	13.1488
14.2733	13.1336
14.2151	13.1167
14.1174	14.028
14.0881	13.9922
13.988	12.9705
13.9638	13.9312
13.9102	12.9463
13.8732	12.9096
13.8642	12.9392
13.8499	12.9304
13.8516	12.9334
13.8455	25.3065
45.4042	25.2218
45.336	25.1126
45.2133	25.0209
45.4015	24.9693
45.309	24.9521
45.2721	24.8938
45.0212	24.8439
45.1817	24.7861
45.1389	24.7428
45.0645	24.7282
44.8469	24.6601
44.9955	24.6373
45.0092	24.6042
44.8004	24.5636
44.9335	24.5379
44.7917	24.482
44.8508	24.4505
44.7716	24.382
44.733	24.3692
44.6605	24.335
44.6909	24.2845
44.6004	24.2246
44.5387	24.2187
44.5162	24.1863
44.5445	24.1711
44.4996	24.1296
44.4171	24.0543
44.3727	24.005
44.0889	23.9856
44.2867	23.9452
43.9462	23.904
44.1642	23.8416
44.2045	23.8118
44.1352	23.7738
43.8532	23.6724
43.9601	23.6587
43.6596	23.6356
43.9299	23.5929
43.5915	23.54
43.8522	23.4905
43.8923	23.4882
43.6892	23.4635
43.6284	23.4312
43.6391	23.3874
43.3537	23.3415
43.3259	23.2754
43.5673	23.2616
43.532	23.2418
43.2	23.1882
43.14	23.1358
43.1089	23.124
43.2254	23.0879
43.31	23.0367
43.0557	23.009
43.2245	22.961
43.1722	22.9416
43.1164	22.8944
42.9722	22.9093
42.9416	22.8765
42.9367	22.8322
42.9087	22.8036
42.9825	22.7712
42.855	22.7004
42.829	22.7049
42.7547	22.6717
42.5026	22.6198
42.4243	22.5624
42.6734	22.5538
42.5544	22.513
42.5431	22.4553
42.4927	22.4215
42.4832	22.3599
42.5244	22.3444
42.4187	22.3266
42.281	22.2848
42.1096	22.2718
42.2421	22.199
42.2807	22.1849
42.2105	22.1692
41.8853	22.1223
41.9338	22.0745
41.8659	22.0378
41.8262	22.0044
41.7733	21.973
41.7452	21.9304
41.8713	21.9082
41.8467	21.8765
41.8178	21.8535
41.7501	21.8102
41.7288	21.7873
41.5108	21.7264
41.6457	21.6755
41.5998	21.6665
41.621	21.626
41.538	21.5988
41.5302	21.5633
41.2074	21.5281
41.3379	21.4757
41.1636	21.4381
41.0767	21.3914
41.2675	21.38
41.2409	21.3411
40.9191	21.2977
41.1866	21.2696
41.0719	21.2181
41.0795	21.1986
40.9705	21.1432
41.0241	21.1293
40.9401	21.0802
40.9232	21.0424
40.6325	21.0191
40.5704	20.9695
40.5823	20.9499
40.6913	20.9142
40.6208	20.8891
40.647	20.8636
40.5524	20.7967
40.3113	20.7866
40.5217	20.7307
40.5281	20.7046
40.4726	20.6633
40.1204	20.6554
40.2706	20.6152
40.0859	20.569
40.0388	20.5583
40.1935	20.5173
39.9443	20.4553
40.1431	20.4224
40.0822	20.4089
40.0115	20.3847
39.8016	20.3378
39.7694	20.2754
39.7053	20.2719
39.8857	20.264
39.8399	20.1912
39.6192	20.205
39.5735	20.133
39.5272	20.0983
39.5219	20.0696
39.4927	20.0527
39.413	19.9962
39.4175	19.9835
39.3794	19.9334
39.2891	19.9082
39.2644	19.8463
39.2109	19.8445
39.1774	19.8007
39.1331	19.7526
39.0683	19.7282
39.0691	19.7135
39.0469	19.6664
39.01	19.6105
38.9219	19.5931
38.9251	19.5315
38.8178	19.5196
38.8204	19.4659
38.7678	19.4366
38.7599	19.4079
38.6899	19.3536
38.6591	19.3328
38.5958	19.2943
38.6	19.2812
38.5008	19.2366
38.7209	19.1639
38.4493	19.1287
38.3741	19.0924
38.3454	19.0501
38.2703	19.0404
38.292	19.0118
38.4037	19.0145
38.2262	18.9623
38.0856	18.9321
38.0988	18.9044
38.0501	18.8661
38.0352	18.791
37.9802	18.6962
37.9248	18.6604
37.9072	18.621
37.8439	18.6029
37.9814	18.5552
37.8086	18.4876
37.9168	18.4636
37.6865	18.4086
37.8466	18.3673
37.8036	18.3414
37.7358	18.2796
37.7378	18.2572
37.7439	18.2
37.4566	18.153
37.6581	18.1036
37.3696	18.078
37.5093	18.0542
37.306	17.9736
37.4851	17.9467
37.4273	17.9022
37.3639	17.8538
37.1594	17.8297
37.1057	17.79
37.1096	17.7687
37.0339	17.7458
36.9654	17.697
37.1727	17.6684
37.1159	17.6255
37.074	17.5951
36.9778	17.5545
36.9626	17.513
36.9436	17.4848
36.7279	17.4399
36.642	17.4047
36.6329	17.3688
36.6221	17.3271
36.5732	17.2742
36.5331	17.2282
36.6592	17.2105
36.6239	17.1654
36.6248	17.1114
36.5352	17.0768
36.5318	17.0703
36.3101	17.0484
36.2709	16.9959
36.1871	16.9574
36.3413	16.9168
36.3723	16.8656
36.2622	16.8101
36	16.798
35.9845	16.7539
35.9669	16.7325
36.1344	16.6849
35.8844	16.662
36.0165	16.6267
35.8248	16.5893
35.7652	16.5525
35.7344	16.5209
35.6606	16.48
35.642	16.4344
35.5904	16.3959
35.5971	16.3682
35.5624	16.3252
35.4656	16.2983
35.6464	16.2869
35.3936	16.2458
35.5251	16.1837
35.3127	16.1648
35.324	16.1263
35.2478	16.0812
35.2143	16.0657
35.1642	16.0035
35.1222	15.986
35.0912	15.9689
35.0498	15.9064
35.0258	15.8689
34.9633	15.8273
34.9073	15.7824
34.8485	15.7484
34.8207	15.7199
34.7882	15.6664
34.739	15.6216
34.7411	15.5884
34.6816	15.5785
34.6436	15.5461
34.6035	15.4957
34.577	15.465
34.4873	15.4301
34.4977	15.3941
34.4506	15.3577
34.391	15.3347
34.3748	15.303
34.3366	15.2661
34.2622	15.2092
34.2056	15.185
34.1853	15.1664
34.1309	15.1087
34.0813	15.0606
34.085	15.0569
34.0421	15.0068
33.9841	14.9851
33.9464	14.9387
33.9067	14.9052
33.8155	14.8965
33.795	14.8581
33.7652	14.8171
33.7343	14.788
33.7122	14.7512
33.6841	14.6901
33.6131	14.6604
33.5833	14.6365
33.5473	14.6019
33.4974	14.5529
33.4486	14.5199
33.4137	14.4888
33.3988	14.4713
33.3565	14.4314
33.3228	14.4011
33.2658	14.3628
33.2169	14.3351
33.2224	14.2741
33.1356	14.2566
33.1307	14.2004
33.1012	14.1729
33.0357	14.127
33.0218	14.103
32.9842	14.0715
32.9251	14.0293
32.9026	13.9914
32.8652	13.9792
32.8593	13.9498
32.8172	13.9006
32.7712	13.8558
32.7865	13.815
32.6815	13.7733
32.5982	13.7343
32.5721	13.7109
32.5583	13.6472
32.5079	13.609
32.4737	13.5715
32.4045	13.5194
32.3705	13.479
32.3133	13.4562
32.2932	13.4088
32.255	13.3829
32.2351	13.3412
32.1787	13.2906
32.1075	13.2528
32.0719	13.2355
32.0622	13.1872
31.9909	13.1417
31.9498	13.1102
31.8933	13.0595
31.868	13.0133
31.8439	12.9929
31.814	12.9258
31.7819	12.8836
31.6835	12.8512
31.6925	12.8157
31.6417	12.7648
31.5697	12.7174
31.5584	12.7058
31.5427	12.6352
31.4941	12.6371
31.4424	12.5695
31.4151	12.5558
31.3611	12.4977
31.334	12.4545
31.2817	12.424
31.2472	12.386
31.1939	12.3302
31.1569	12.2979
31.1333	12.2506
31.1038	12.2413
31.0621	12.2076
31.0137	12.1664
30.9716	12.119
30.9542	12.0809
30.8932	12.071
30.8582	12.0246
30.807	11.9851
30.7764	11.9659
30.7276	11.9238
30.7047	11.9053
30.6601	11.863
30.618	11.8281
30.5515	11.8074
30.5425	11.7795
30.4775	11.7488
30.4582	11.7021
30.4178	11.6715
30.3795	11.6429
30.3356	11.6056
30.2822	11.5702
30.2076	11.5346
30.2067	11.5046
30.1916	11.4693
30.1297	11.4432
30.0518	11.4
30.0233	11.3679
29.9629	11.3288
29.9438	11.3022
29.905	11.2639
29.8567	11.2362
29.8146	11.1957
29.7938	11.1531
29.7435	11.1112
29.7033	11.0872
29.6633	11.0312
29.6342	10.9832
29.5809	10.943
29.5573	10.9174
29.5094	10.8709
29.4577	10.8411
29.4021	10.8144
29.3972	10.7488
29.367	10.7318
29.3132	10.6852
29.249	10.6671
29.2339	10.6145
29.1827	10.5805
29.1386	10.5495
29.1124	10.5067
29.0567	10.4799
29.0029	10.4437
28.9573	10.4101
28.9122	10.3583
28.872	10.3366
28.8142	10.3045
28.7879	10.2702
28.7085	10.2224
28.7049	10.1907
28.6444	10.1683
28.5762	10.1238
28.5479	10.0817
28.5192	10.0499
28.482	10.0057
28.4258	9.96249
28.3865	9.90962
28.3361	9.88617
28.2831	9.84712
28.2454	9.81269
28.2044	9.77925
28.1567	9.73631
28.1182	9.69932
28.0734	9.6691
28.0203	9.62644
27.9719	9.58511
27.9149	9.54364
27.882	9.50323
27.8538	9.45796
27.8119	9.42522
27.8169	9.37238
27.768	9.34222
27.6987	9.30769
27.6683	9.27531
27.6488	9.21625
27.5996	9.18939
27.5368	9.14855
27.5048	9.11362
27.4746	9.06397
27.4307	9.02691
27.3878	8.99186
27.3603	8.94846
27.3333	8.91557
27.255	8.87806
27.2495	8.84138
27.2013	8.81983
27.1184	8.78698
27.0983	8.74377
27.0376	8.73652
27.0339	8.72361
26.952	8.73181
26.9311	8.72826
26.8977	8.73132
26.8487	7.91187
26.7762	7.8886
26.7704	7.86846
26.6965	7.86911
26.6661	7.84765
26.6219	7.85236
26.58	7.82081
26.5322	7.82916
26.5231	7.81416
26.4357	7.81289
26.3944	7.79752
26.343	7.80224
26.2988	7.77759
26.268	7.77617
26.2377	7.7856
26.1835	7.77619
26.1417	7.75253
26.0805	7.7679
26.0462	7.758
26.0098	7.74891
25.9642	7.72956
25.9428	7.74853
25.8839	7.73134
25.8264	7.73798
25.8121	7.73803
25.7608	7.72078
25.7241	7.71934
25.6813	7.71772
25.669	7.70292
25.6426	7.70772
25.5813	7.70398
25.5406	7.67934
25.5398	7.67687
25.4767	7.67802
25.4656	7.67177
25.3686	7.66309
25.3603	7.65871
25.2954	7.66029
25.2784	7.651
25.2067	7.6431
25.1964	7.62931
25.126	7.63673
25.1025	7.6017
25.0651	7.6014
25.0223	7.59044
24.9468	7.58937
24.9291	7.57658
24.8826	7.59172
24.8584	7.56917
24.791	7.56859
24.746	7.54315
24.7238	7.54687
24.6681	7.52831
24.6595	7.55231
24.6039	7.52515
24.5611	7.51234
24.5317	7.51069
24.4965	7.50027
24.4947	7.49542
24.4091	7.47343
24.4028	7.47942
24.3354	7.48583
24.2847	7.46421
24.2222	7.45951
24.1648	7.44855
24.1486	7.44498
24.1427	7.43343
24.0677	7.41643
24.0462	7.40579
23.981	7.40684
23.9611	7.40533
23.9092	7.38645
23.8583	7.39003
23.807	7.37726
23.776	7.3731
23.7507	7.35835
23.7237	7.33976
23.6874	7.35416
23.6743	7.32616
23.5991	7.31445
23.5759	7.31362
23.5059	7.31343
23.503	7.29403
23.4412	7.30807
23.4255	7.29328
23.352	7.26879
23.3224	7.26378
23.236	7.05076
23.2071	7.06091
23.1459	7.0458
23.0952	7.06313
23.0601	7.05823
23.0303	7.05703
22.9939	7.094
22.9452	7.05191
22.9011	7.04307
22.876	7.07588
22.8082	7.04261
22.802	7.03836
22.7452	7.04847
22.7276	7.03994
22.6844	7.02926
22.6285	7.01257
22.5893	7.08158
22.5683	7.06587
22.5067	6.9756
22.4916	6.99452
22.4291	6.99114
22.4084	7.04442
22.3624	7.0344
22.3403	7.02895
22.2745	6.97534
22.2357	7.01045
22.1851	7.00824
22.1581	7.00702
22.1051	7.00349
22.0972	7.0025
22.0397	6.98586
22.0168	6.98181
21.9729	6.91938
21.9151	6.97461
21.8854	6.94902
21.8624	6.89541
21.809	6.88876
21.7667	6.93451
21.7281	6.89835
21.7086	6.89631
21.6751	6.91311
21.6228	6.87382
21.5815	6.88143
21.5497	6.85808
21.4955	6.81586
21.4528	6.85427
21.4097	6.83975
21.3664	6.80381
21.3106	6.81333
21.2687	6.76046
21.2245	6.74599
21.1813	6.75019
21.1286	6.73642
21.082	6.73694
21.0233	6.71196
20.9922	6.69702
20.964	6.71283
20.9193	6.70037
20.8763	6.69449
20.8685	6.69609
20.8475	6.66707
20.8455	6.63385
20.8467	6.65823
20.8531	6.62686
35.4247	6.63949
35.4958	6.64122
35.5311	6.60491
35.6521	6.59399
35.5483	6.57345
35.3551	6.56022
35.4958	6.57533
35.5244	6.5519
35.7245	6.54128
35.6352	6.55279
35.614	6.5284
35.5328	6.52369
35.6631	6.52174
35.3855	6.695
35.513	6.51173
35.5151	6.68987
35.4083	6.48969
35.425	6.48101
35.4919	6.48104
35.4432	6.47597
35.5663	6.64769
35.5878	6.62394
35.4937	6.64708
35.3607	6.61854
35.5384	6.60509
35.6836	6.61427
35.6324	6.60922
35.5086	6.60297
35.6244	6.59915
35.5443	6.59027
35.522	6.58783
35.6218	6.5851
35.5187	6.57844
35.5738	6.5616
35.6172	6.56002
35.586	6.55425
35.5317	6.53813
35.5944	6.53033
35.5775	6.51635
35.602	6.52316
35.3919	6.52085
35.4194	6.52288
35.4103	6.50762
35.4918	6.5066
35.4278	6.49087
35.591	6.4945
35.5536	6.48274
35.6303	6.49097
35.5254	6.47201
35.5235	6.48016
35.5841	6.47371
35.5361	6.4575
35.5798	6.44897
35.5815	6.44882
35.4677	6.45114
35.4865	6.45377
35.5241	6.45017
35.4776	6.45009
35.4562	6.42895
35.4315	6.4318
35.5393	6.42328
35.5187	6.39902
35.5191	6.3927
35.4077	6.39188
35.4261	6.39346
35.3785	6.3963
35.2898	6.37911
35.4481	6.3657
35.5719	6.37642
35.3313	6.36276
35.3392	6.36594
35.3613	6.34742
35.2016	6.35251
35.4932	6.36484
35.3982	6.32316
35.4339	6.34147
35.4561	6.31242
35.4884	6.32647
35.3826	6.29032
35.426	6.29391
35.316	6.29444
35.3268	6.29481
35.2547	6.27923
35.4035	6.29362
35.3626	6.28114
35.2791	6.3089
35.321	6.26011
35.3335	6.26309
35.3044	6.25093
35.3092	6.24734
35.3379	6.24623
35.2384	6.24062
35.2206	6.23008
35.1876	6.21153
34.9859	6.20463
35.05	6.2148
35.0329	6.19739
35.0075	6.2087
34.9139	6.18021
34.8358	6.17719
34.8261	6.16855
34.8309	6.16707
34.8601	6.15702
34.8773	6.14341
34.8429	6.1361
34.838	6.14823
34.6787	6.15275
34.7932	6.14118
34.6655	6.11902
34.8905	6.10807
34.7331	6.10297
34.8003	6.10166
34.5777	6.09106
34.7574	6.09668
34.6016	6.08633
34.5498	6.08984
34.5161	6.09411
34.5349	6.06873
34.4438	6.06961
34.4422	6.06403
34.3047	6.06188
34.4321	6.06473
34.3891	6.04835
34.4554	6.06982
34.4626	6.03322
34.462	6.03646
34.3688	6.01449
34.4362	6.02712
34.381	5.99539
34.4184	6.00485
34.3365	5.98547
34.4086	6.00475
34.3471	5.96131
34.4817	5.98566
34.4105	5.95576
34.3778	5.95517
34.3611	5.94343
34.4635	5.93271
34.3086	5.90742
34.4951	5.90451
34.4397	5.88003
34.4324	5.86817
34.2559	5.71486
34.3296	5.70257
34.3634	5.73819
34.399	5.72356
34.3376	5.74558
34.3264	5.73343
34.3127	5.72689
34.387	5.72298
34.2395	5.73294
34.3319	5.70157
34.1874	5.7125
34.2893	5.69956
34.1848	5.69962
34.1969	5.69808
34.1624	5.73003
34.1008	5.70487
34	5.70266
34.142	5.66815
34.1094	5.70781
34.071	5.65393
34.0151	5.69361
34.0569	5.64163
34.0178	5.6476
34.0522	5.61321
34.026	5.62462
34.0758	5.58068
34.0116	5.60495
34.0104	5.60333
33.8865	5.63425
33.9936	5.6172
33.9607	5.65364
33.9584	5.5622
33.9357	5.59899
34.0208	5.55456
33.8958	5.59629
33.933	5.59592
33.8038	5.58946
33.7813	5.53609
33.8016	5.57498
33.8994	5.52383
33.8023	5.56305
33.8879	5.5481
33.8446	5.55554
33.8905	5.53098
33.7272	5.54995
33.7834	5.53966
33.6499	5.5261
33.7051	5.53101
33.631	5.53112
33.7494	5.47926
33.5935	5.514
33.6119	5.44611
33.5292	5.49843
33.7388	5.43531
33.514	5.47765
33.7317	5.43035
33.5242	5.45669
33.605	5.41872
33.5535	5.46413
33.6212	5.40155
33.5829	5.4366
33.7004	5.40565
33.5029	5.43544
33.6084	5.40968
33.4768	5.42599
33.5111	5.36701
33.5434	5.40775
33.4924	5.3898
33.439	5.39461
33.5484	5.36948
33.3932	5.38239
33.4653	5.36926
33.4661	5.37137
33.4565	5.35567
33.5356	5.34742
33.4181	5.33196
33.3788	5.33906
33.3974	5.30674
33.3324	5.32637
33.4248	5.30066
33.3365	5.29155
33.367	5.29931
33.3035	5.28538
33.4557	5.27419
33.3783	5.28678
33.3643	5.26165
33.3683	5.26245
33.4627	5.19968
33.3683	5.22896
33.4246	5.22611
33.3845	5.17368
33.3634	5.13575
33.2724	5.16001
33.3573	5.1399
33.308	5.13235
33.3445	5.10603
33.2885	5.11827
33.2867	5.1176
33.1911	5.11204
33.2187	5.09746
33.1764	5.08844
33.1356	5.05754
33.0096	5.05744
33.1254	5.16272
33.1776	5.06401
33.1046	5.0138
33.0793	5.13701
33.1197	5.00874
33.1259	5.02133
33.2127	5.14178
33.0533	5.12041
33.0498	5.12412
33.0784	5.11731
33.0842	5.11663
33.066	5.09588
33.1385	5.09452
33.0836	5.08367
33.1518	5.09028
33.0274	5.07875
33.1879	5.0582
33.0947	5.06001
33.1196	5.0531
33.0093	5.04238
33.1571	5.02414
33.0743	5.05283
33.1872	5.0502
33.0585	5.04139
33.1106	5.03589
32.989	5.04515
33.0967	5.02529
33.0374	5.00691
33.1022	5.03033
33.0875	4.99663
33.0908	5.01567
33.0318	4.98579
33.0859	4.99258
32.966	4.99778
33.028	4.98517
33.0163	4.96698
33.0014	4.96064
32.9132	4.96245
33.0183	4.97127
32.9543	4.95781
32.9177	4.94433
32.9551	4.94354
32.8931	4.92776
32.9948	4.91898
33.0178	4.91313
32.9091	4.92052
33.0123	4.91892
32.9157	4.88836
33.0154	4.9054
32.9221	4.87782
33.0192	4.877
32.899	4.87419
32.9302	4.88723
32.9309	4.88357
32.9461	4.88828
32.8773	26.6042
32.8791	26.5712
32.7774	26.4929
32.8994	26.4617
32.7994	26.415
32.8579	26.4227
32.9539	26.3933
32.8781	26.3682
32.8599	26.3117
32.8654	26.3264
32.7627	26.2717
32.8452	26.2855
32.7937	26.2368
32.7992	26.2457
32.7259	26.2335
32.7802	26.1629
32.6385	26.1352
32.7308	26.1267
32.6983	26.0641
32.745	26.0601
32.7185	26.0155
32.7304	26.0659
32.6759	24.1707
32.6788	23.4503
32.6588	21.5043
32.7663	21.4212
32.6924	22.0547
32.6942	22.1646
32.733	22.3006
32.7624	23.0132
32.6628	23.0243
32.8064	23.2259
32.7946	23.4226
32.758	24.1134
32.6906	23.7389
32.8337	24.2396
32.8082	24.881
32.8053	24.6789
32.7923	25.2403
32.828	25.6423
32.7208	25.4439
32.8014	25.098
32.7375	25.4547
32.7174	26.4104
32.7021	22.7018
32.7761	23.1453
32.7219	22.815
32.6717	23.0244
32.7061	24.8195
32.7398	21.8617
32.7614	22.0001
32.8237	25.814
32.7273	21.6437
32.7698	24.7142
32.6522	23.969
32.6812	24.0567
32.6366	24.0121
32.643	21.8101
32.5696	22.0877
32.6434	24.6423
32.6698	25.4058
32.6448	22.2603
32.6316	22.2922
32.6295	23.4711
32.5925	23.7636
32.5719	23.9527
32.5195	23.5848
32.5534	23.6575
32.5272	23.5337
32.5411	23.9986
32.5216	23.2699
32.5255	23.9451
32.5319	23.4717
32.5043	23.9247
32.4951	23.9048
32.565	24.4412
32.5182	24.0241
32.4616	24.4587
32.5256	23.4985
32.4581	23.9649
32.4952	23.5862
32.3932	24.1968
32.3951	23.5461
32.3699	23.3209
32.4817	23.3793
32.3985	23.4469
32.4028	25.4724
32.2814	25.7229
32.3669	24.9985
32.2993	25.1789
32.413	24.3412
32.3182	24.3304
32.4166	23.9645
32.3508	24.6314
32.46	24.031
32.3453	24.13
32.333	23.1844
32.3629	23.4799
32.3531	22.9067
32.3711	23.1941
32.3567	22.974
32.3986	22.6886
32.3234	22.5354
32.2796	22.8928
32.3392	21.9224
32.334	22.0797
32.2762	21.9375
32.2976	21.8976
32.2633	21.7626
32.3053	21.609
32.2595	21.2119
32.2449	21.4718
32.2491	21.009
32.2407	20.7299
32.1854	20.7158
32.1785	20.734
32.1896	20.8926
32.1075	20.6359
32.2082	20.7215
32.1484	20.5864
32.1703	20.5626
32.2266	20.6583
32.2738	20.3051
32.1864	21.0937
32.2578	21.6868
32.15	20.7462
32.1698	22.4714
32.1534	21.7841
32.116	22.854
32.1413	22.608
32.159	22.7996
32.0656	22.0787
32.1358	23.0287
32.106	21.4682
32.1069	22.8267
32.0444	22.9461
32.0486	22.7611
32.0297	22.6618
32.0821	22.6112
32.0576	22.8647
32.0963	24.4772
32.0518	22.4018
32.0435	22.8028
32.0308	22.7372
32.0239	22.794
32.0002	22.536
32.0205	22.6873
31.971	22.9713
31.9597	23.4443
31.9652	22.5054
31.9529	22.5856
31.8759	24.2223
31.9176	24.2187
31.7976	22.7275
31.9009	24.1865
31.7533	24.163
31.8355	24.1214
31.773	24.1424
31.7947	24.0784
31.7835	24.0995
31.7985	24.1053
31.7422	24.0418
31.8315	24.0152
31.7965	24.0043
31.7873	23.9479
31.7856	23.9399
31.8489	23.9339
31.722	23.8877
31.8088	23.8861
31.7762	23.8525
31.8623	23.8013
31.7871	23.8137
31.8198	23.8364
31.7359	23.7999
31.7881	23.7896
31.7824	23.7585
31.7678	23.7188
31.7902	23.704
31.8815	23.6992
31.7929	23.6827
31.8024	23.6624
31.8298	23.6359
31.7774	23.6224
31.7862	23.5774
31.8304	23.5646
31.8345	23.5617
31.825	23.4956
31.754	23.54
31.7392	23.4717
31.7955	23.4643
31.8312	23.4323
31.701	23.4289
31.8476	23.4068
31.7579	23.4022
31.8133	23.4215
[truncated: 1,158 more rows]
