# Supplementary material for: Pre-complexation of talin and vinculin without tension is required for efficient nascent adhesion maturation
Source: eLife. 2021 Mar 30;10:e66151. doi: 10.7554/eLife.66151 (PMC8009661; doi:10.7554/eLife.66151)
Supplement: Figure 5—source data 2. [file elife-66151-fig5-data2.xlsx]

## Sheet: faDensity
Row	Median (Pa)	Upper Adjacent Value	Lower Adjacent Value	Upper Whisker	Lower Whisker	Outlier
R8vvv-mNG (N=2105)	0.00616599	0.0149887	0.00298148	0.00998392	0.00298148
WT-talin1 (N=3157)	0.0134216	0.0216824	0.0119732	0.016373	0.0119732
