# Supplementary material for: Pre-complexation of talin and vinculin without tension is required for efficient nascent adhesion maturation
Source: eLife. 2021 Mar 30;10:e66151. doi: 10.7554/eLife.66151 (PMC8009661; doi:10.7554/eLife.66151)
Supplement: Figure 5—source data 3. [file elife-66151-fig5-data3.xlsx]

## Sheet: Sheet1
R8vvv-mNG	WT-talin1
0.229749	0.284058
0.224624	0.276128
0.24304	0.270048
0.249455	0.272361
0.215406	0.273938
0.232094	0.25482
0.214122	0.269662
0.2112	0.267994
0.23421	0.287423
0.211968	0.27655
0.244724	0.293411
0.227765	0.270691
0.230945	0.272529
0.222502	0.260092
0.231893	0.262341
0.225935	0.265807
0.239282	0.316982
0.226297	0.26475
0.254348	0.253901
0.238044	0.256323
0.244966	0.268649
0.236069	0.275441
0.225032	0.263768
0.234971	0.264812
0.26784	0.257207
0.237037	0.265705
0.234338	0.267815
0.220703	0.272
0.233	0.275078
0.230206	0.260521
0.214281	0.255841
0.219294	0.260382
0.209347	0.265032
0.247303	0.279111
0.222903	0.27338
0.224656	0.280391
0.218839	0.268743
0.232443	0.297183
0.216747	0.273208
0.211702	0.284528
0.220104	0.28416
0.244267	0.270479
0.194267	0.270031
0.213459	0.268591
0.222821	0.265517
0.198892	0.265374
0.238545	0.258671
0.210544	0.267781
0.220968	0.329871
0.233432	0.280225
0.207766	0.272393
0.203974	0.252587
0.234459	0.263637
0.231176	0.260148
0.2296	0.273086
0.218729	0.277297
0.232296	0.273067
0.224206	0.266996
0.225358	0.25665
0.22656	0.256262
0.223709	0.255193
0.225948	0.27206
0.232615	0.253657
0.2416	0.2656
0.226933	0.256779
0.238566	0.267852
0.237683	0.273353
0.221729	0.279885
0.229547	0.275488
0.209143	0.247165
0.259896	0.26551
0.23936	0.268299
0.215406	0.255845
0.237462	0.276202
0.24144	0.270092
0.253523	0.25606
0.242317	0.24476
0.226194	0.274944
0.265048	0.257499
0.228876	0.282545
0.233867	0.264229
0.242979	0.268483
0.257536	0.256941
0.234193	0.25795
0.229333	0.285249
0.235687	0.277062
0.229333	0.26713
0.232258	0.268976
0.229029	0.261997
0.239247	0.264533
0.247162	0.271266
0.2368	0.250994
0.223158	0.2619
0.265067	0.270861
0.235355	0.273932
0.259938	0.27846
0.2648	0.276865
0.238857	0.2643
0.229389	0.2592
0.237665	0.27392
0.234193	0.271892
0.254255	0.267979
0.2304	0.27344
0.239669	0.258695
0.217234	0.265626
0.224492	0.27036
0.258933	0.258096
0.252681	0.282251
0.257324	0.277096
0.229851	0.271337
0.2496	0.256
0.257659	0.266538
0.207568	0.266667
0.264862	0.262912
0.241067	0.255269
0.245511	0.284719
0.224753	0.27197
0.238658	0.265239
0.258194	0.266017
0.228622	0.261517
0.246222	0.273379
0.23744	0.26918
0.22943	0.253213
0.235378	0.26592
0.215697	0.26835
0.243446	0.266034
0.219409	0.258007
0.2112	0.261209
0.237213	0.273308
0.24111	0.2624
0.222578	0.272597
0.250262	0.258336
0.221538	0.27263
0.240941	0.256197
0.250331	0.2624
0.238484	0.264357
0.245333	0.279704
0.244065	0.273346
0.233846	0.255698
0.21984	0.258803
0.230594	0.259005
0.237213	0.266387
0.243394	0.266111
0.248824	0.257869
0.226909	0.27008
0.211749	0.262965
0.228754	0.252615
0.2014	0.262147
0.223481	0.249057
0.213504	0.243003
0.1904	0.262977
0.2276	0.265251
0.220988	0.268693
0.2282	0.274919
0.216533	0.26544
0.233432	0.256597
0.245677	0.257197
0.2304	0.251961
0.229236	0.267262
0.234174	0.262912
0.2588	0.254864
0.233956	0.257147
0.227291	0.252852
0.208	0.251627
0.218611	0.249876
0.235707	0.245241
0.2178	0.251803
0.2582	0.261989
0.206653	0.248552
0.2174	0.257389
0.228461	0.268585
0.22096	0.263587
0.226667	0.270535
0.223467	0.253735
0.236949	0.262834
0.2432	0.257627
0.237319	0.260606
0.218764	0.271502
0.2342	0.259752
0.217966	0.265744
0.214905	0.258322
0.224213	0.265023
0.235159	0.272238
0.227692	0.267571
0.20576	0.264192
0.210944	0.278371
0.222104	0.266532
0.233084	0.280267
0.226933	0.265674
0.228634	0.272971
0.232533	0.265917
0.213426	0.260485
0.233472	0.263759
0.238786	0.261695
0.233891	0.268704
0.226207	0.265521
0.217354	0.272661
0.223654	0.263909
0.203657	0.275938
0.223117	0.277333
0.23776	0.277607
0.217379	0.268602
0.228923	0.277136
0.223794	0.267268
0.201216	0.274219
0.249143	0.267471
0.204326	0.272661
0.198857	0.268573
0.200107	0.271683
0.20883	0.287086
0.223754	0.262785
0.214857	0.27477
0.233018	0.279845
0.237683	0.283949
0.194462	0.27725
0.211406	0.297896
0.232889	0.289527
0.224492	0.278715
0.229565	0.281437
0.231424	0.270007
0.220089	0.269372
0.252648	0.276458
0.2336	0.27189
0.2118	0.294283
0.1902	0.26516
0.233768	0.274031
0.255644	0.267253
0.210618	0.277943
0.235276	0.287323
0.211692	0.347655
0.240842	0.275141
0.22624	0.274898
0.237474	0.26179
0.230637	0.271754
0.240552	0.275905
0.21927	0.256768
0.216981	0.253564
0.205462	0.274343
0.21248	0.26199
0.2112	0.264992
0.198171	0.2528
0.231585	0.278945
0.253305	0.263702
0.224305	0.262259
0.230095	0.270654
0.21792	0.260036
0.22784	0.256507
0.213915	0.255655
0.2208	0.274325
0.23776	0.265285
0.23584	0.273479
0.197415	0.256842
0.229169	0.26689
0.223754	0.27486
0.197161	0.258727
0.210909	0.262347
0.208188	0.261251
0.238293	0.251331
0.221867	0.255596
0.218	0.27444
0.218667	0.25056
0.215111	0.255771
0.215467	0.276677
0.215111	0.272095
0.2472	0.275649
0.203276	0.262233
0.206484	0.262195
0.203345	0.264314
0.225745	0.266483
0.208929	0.272465
0.237673	0.260191
0.238019	0.258536
0.213426	0.260068
0.190464	0.256115
0.233846	0.249023
0.221217	0.266221
0.21504	0.248754
0.228542	0.244757
0.215877	0.269556
0.223232	0.258441
0.222171	0.262454
0.225455	0.243002
0.2128	0.254923
0.210365	0.259948
0.209152	0.264807
0.244073	0.270268
0.233309	0.274504
0.251124	0.253961
0.203886	0.27871
0.217905	0.251187
0.226462	0.255294
0.210759	0.264896
0.2392	0.262938
0.254836	0.24705
0.231733	0.2656
0.245333	0.258444
0.247733	0.248747
0.221867	0.257038
0.225948	0.267406
0.231432	0.258735
0.25767	0.272
0.281853	0.271252
0.285787	0.257224
0.279223	0.25344
0.26976	0.274808
0.266685	0.254609
0.268627	0.273485
0.279349	0.262219
0.287235	0.264245
0.285667	0.267143
0.269649	0.26155
0.281738	0.273166
0.269144	0.269483
0.261452	0.260435
0.266435	0.274585
0.272257	0.273067
0.271033	0.267043
0.27664	0.277387
0.2488	0.252908
0.270238	0.267077
0.276665	0.261608
0.256431	0.340736
0.252273	0.271476
0.280305	0.275552
0.25127	0.25543
0.260851	0.260245
0.26629	0.245419
0.251152	0.257244
0.261421	0.255812
0.257634	0.258198
0.314432	0.247485
0.251777	0.262701
0.271743	0.25391
0.25606	0.266998
0.241718	0.254328
0.260472	0.256
0.245504	0.252916
0.245888	0.272147
0.258133	0.260359
0.255564	0.270896
0.254308	0.263955
0.258311	0.256497
0.264533	0.259596
0.257912	0.25774
0.280533	0.280064
0.2656	0.252746
0.252207	0.263235
0.258514	0.26781
0.256703	0.268867
0.238065	0.265331
0.261278	0.272371
0.240982	0.265897
0.256281	0.269446
0.258158	0.270222
0.254746	0.257752
0.252878	0.26337
0.26982	0.276289
0.240924	0.268565
0.26652	0.25612
0.258422	0.255701
0.264186	0.253964
0.328582	0.259115
0.256703	0.272213
0.250336	0.255651
0.260289	0.277807
0.2688	0.260769
0.268966	0.262827
0.275957	0.261132
0.263814	0.263852
0.276232	0.262598
0.272284	0.261682
0.260243	0.270327
0.286455	0.26048
0.276781	0.268032
0.275072	0.258695
0.2752	0.257959
0.261157	0.276089
0.26153	0.267032
0.267868	0.257292
0.271389	0.261808
0.26164	0.269785
0.266109	0.264663
0.271777	0.264596
0.278436	0.260309
0.260145	0.2696
0.269184	0.249071
0.262144	0.25324
0.258321	0.254188
0.274009	0.266733
0.262922	0.260923
0.27128	0.251231
0.272246	0.265398
0.266255	0.246789
0.286769	0.272966
0.257634	0.263938
0.278122	0.265505
0.280036	0.281902
0.266372	0.28489
0.269081	0.272894
0.267976	0.351353
0.281387	0.267093
0.28649	0.247376
0.277224	0.282626
0.261447	0.260848
0.268364	0.27526
0.255498	0.267781
0.252227	0.247832
0.273405	0.240979
0.245413	0.254943
0.278435	0.250493
0.262827	0.245975
0.264901	0.256519
0.27978	0.23936
0.26335	0.278778
0.268082	0.264384
0.271851	0.263815
0.267434	0.252112
0.259745	0.278887
0.269878	0.251526
0.276952	0.274533
0.306	0.265117
0.278739	0.269162
0.283358	0.253135
0.275564	0.269176
0.254867	0.254536
0.261861	0.261502
0.273713	0.277933
0.261243	0.260701
0.266226	0.275145
0.260948	0.26973
0.262887	0.265782
0.285181	0.267789
0.274055	0.259959
0.279771	0.264634
0.276383	0.274106
0.262529	0.285059
0.26614	0.276734
0.279341	0.271021
0.263478	0.275359
0.267068	0.273778
0.266039	0.273507
0.259273	0.272372
0.266749	0.286815
0.25984	0.292945
0.258654	0.285314
0.258447	0.273573
0.270764	0.290793
0.246995	0.293084
0.271771	0.30877
0.273252	0.284329
0.272099	0.271309
0.244167	0.26132
0.258753	0.262253
0.272315	0.276848
0.272967	0.263226
0.241786	0.270518
0.27	0.267937
0.265027	0.25521
0.26639	0.2496
0.278171	0.265968
0.250514	0.258493
0.256594	0.264125
0.2496	0.256862
0.294597	0.249272
0.281818	0.244697
0.249773	0.238558
0.260364	0.249433
0.259978	0.249132
0.24896	0.257495
0.257929	0.256335
0.265857	0.25341
0.26376	0.260319
0.2498	0.230697
0.257118	0.254712
0.258954	0.257468
0.271918	0.253251
0.257878	0.257308
0.259308	0.258465
0.250691	0.260489
0.250092	0.248595
0.263795	0.237851
0.26112	0.259635
0.25998	0.254894
0.271855	0.240284
0.263467	0.248566
0.253239	0.243916
0.268089	0.242075
0.241467	0.242679
0.26564	0.238186
0.258353	0.244247
0.252114	0.243413
0.255912	0.239898
0.25784	0.236012
0.258268	0.244173
0.247961	0.25468
0.257817	0.232217
0.28142	0.245701
0.262169	0.236144
0.256582	0.239854
0.248944	0.235042
0.256468	0.241841
0.254144	0.244653
0.258661	0.230266
0.229376	0.243551
0.252681	0.233333
0.2448	0.236226
0.261681	0.253165
0.262484	0.241719
0.248978	0.230854
0.242714	0.249471
0.248415	0.228541
0.248986	0.246677
0.306872	0.22427
0.240627	0.227086
0.244945	0.23315
0.276578	0.235969
0.239543	0.231715
0.249462	0.234098
0.260668	0.237322
0.236734	0.218863
0.241903	0.226954
0.23808	0.239174
0.240835	0.23565
0.248717	0.23137
0.250092	0.245265
0.266358	0.242968
0.253213	0.223224
0.245005	0.238962
0.256659	0.226626
0.312652	0.220032
0.25104	0.227424
0.258667	0.227134
0.259534	0.236447
0.252571	0.235121
0.263616	0.242732
0.322796	0.239136
0.252644	0.237244
0.269023	0.236538
0.247337	0.223822
0.258731	0.244516
0.24944	0.251338
0.254357	0.241256
0.24976	0.232811
0.259927	0.227613
0.247273	0.235162
0.251072	0.224367
0.249187	0.246494
0.247309	0.225484
0.24488	0.230491
0.259657	0.232699
0.263341	0.240427
0.249256	0.228905
0.249829	0.23879
0.249986	0.234258
0.255804	0.237191
0.25504	0.227026
0.251575	0.231331
0.268935	0.243588
0.236875	0.231726
0.254947	0.23828
0.258251	0.239508
0.24494	0.219804
0.244404	0.242797
0.247701	0.252621
0.25728	0.234426
0.25392	0.241509
0.256819	0.232568
0.244163	0.244439
0.247609	0.230705
0.246248	0.231754
0.240291	0.232643
0.251662	0.23904
0.254748	0.233196
0.259669	0.238574
0.270115	0.238976
0.257659	0.219733
0.2528	0.238306
0.269137	0.250634
0.241793	0.22755
0.266459	0.223713
0.263067	0.232679
0.256229	0.23931
0.255802	0.239609
0.261087	0.240389
0.260042	0.253242
0.26479	0.236636
0.26887	0.237148
0.240945	0.22912
0.25304	0.251498
0.246737	0.240623
0.249535	0.254836
0.275058	0.232249
0.270094	0.248526
0.26729	0.23424
0.253507	0.240908
0.253619	0.23545
0.255513	0.250791
0.249535	0.242733
0.272838	0.234958
0.260046	0.24176
0.264287	0.236656
0.255812	0.249344
0.218438	0.233216
0.210729	0.251915
0.229908	0.250038
0.219444	0.226034
0.228185	0.245806
0.209938	0.22606
0.215281	0.237778
0.204117	0.233639
0.209872	0.243567
0.200686	0.234681
0.203248	0.23551
0.216068	0.252461
0.22784	0.228677
0.212724	0.235617
0.242432	0.251906
0.216853	0.230222
0.222264	0.240565
0.215622	0.237279
0.237867	0.240259
0.200882	0.240881
0.206898	0.259148
0.194712	0.241067
0.18891	0.251609
0.200031	0.242465
0.200533	0.251447
0.209387	0.244539
0.206613	0.247176
0.184253	0.234435
0.189333	0.24088
0.192	0.252
0.210048	0.244933
0.199086	0.245895
0.235368	0.236975
0.188842	0.233132
0.203886	0.227814
0.205206	0.232724
0.196887	0.252444
0.20096	0.244393
0.19861	0.236964
0.203871	0.23415
0.214069	0.246765
0.202483	0.236842
0.19232	0.24498
0.18946	0.260361
0.200178	0.246133
0.209958	0.25527
0.202971	0.245899
0.211406	0.2368
0.218426	0.229449
0.213178	0.246002
0.2048	0.246531
0.202426	0.247247
0.199148	0.25344
0.202447	0.241568
0.203751	0.237059
0.196335	0.232498
0.194981	0.249733
0.19456	0.2344
0.212053	0.237322
0.203268	0.247135
0.212	0.254947
0.1963	0.239236
0.196298	0.253203
0.184503	0.249721
0.1953	0.264206
0.1968	0.243752
0.224112	0.241007
0.211978	0.244537
0.200145	0.252187
0.207709	0.243328
0.189946	0.255731
0.198317	0.247591
0.1906	0.266533
0.199787	0.243654
0.1984	0.251057
0.195328	0.239308
0.195297	0.236005
0.211302	0.252846
0.188657	0.242147
0.207381	0.235263
0.198018	0.24205
0.197244	0.244823
0.203453	0.242385
0.19968	0.25427
0.20224	0.250195
0.194787	0.240851
0.216081	0.244069
0.205923	0.224743
0.202824	0.226288
0.195252	0.254578
0.199051	0.250426
0.192519	0.238623
0.194434	0.231656
0.20459	0.221209
0.193182	0.240128
0.199948	0.231737
0.189765	0.241054
0.179289	0.240914
0.19623	0.241462
0.1864	0.235235
0.204218	0.237802
0.180151	0.236667
0.201371	0.240993
0.229901	0.237953
0.197371	0.238057
0.194469	0.239104
0.191333	0.233779
0.194438	0.239701
0.173867	0.239979
0.182351	0.241209
0.18977	0.23032
0.1835	0.24217
0.191331	0.225122
0.183502	0.228
0.194773	0.224
0.173639	0.225861
0.185035	0.239471
0.199424	0.234682
0.17471	0.227351
0.190007	0.22
0.172322	0.222926
0.177261	0.23136
0.197805	0.232712
0.187561	0.229333
0.177006	0.238542
0.190694	0.232352
0.186279	0.230223
0.1878	0.230585
0.181613	0.227259
0.188571	0.230437
0.189829	0.238829
0.196881	0.22971
0.185084	0.223508
0.194317	0.226246
0.187264	0.251619
0.186616	0.236368
0.192896	0.231333
0.192711	0.22238
0.179433	0.239114
0.17837	0.229986
0.183105	0.2344
0.175144	0.231195
0.197181	0.229456
0.180247	0.241876
0.1733	0.224254
0.190933	0.242909
0.202533	0.219877
0.18949	0.2288
0.199573	0.245244
0.194286	0.230864
0.193433	0.235121
0.192868	0.247177
0.190448	0.23733
0.182795	0.241408
0.17952	0.223587
0.181148	0.237163
0.189166	0.226344
0.170852	0.233407
0.189774	0.234566
0.198102	0.237006
0.186604	0.236432
0.198536	0.217729
0.200736	0.235084
0.18656	0.236511
0.194777	0.240071
0.185719	0.223543
0.189616	0.232563
0.187167	0.241008
0.178502	0.246524
0.189572	0.245001
0.188848	0.219842
0.19437	0.235025
0.199447	0.2372
0.182933	0.236507
0.177554	0.229962
0.187768	0.241187
0.183771	0.233081
0.18176	0.245271
0.196527	0.226931
0.181232	0.235079
0.198827	0.227053
0.18571	0.227321
0.182225	0.240715
0.179582	0.225292
0.183941	0.229951
0.176559	0.241067
0.178979	0.240653
0.18304	0.212582
0.181943	0.228446
0.181071	0.228288
0.186791	0.233915
0.186604	0.232879
0.196894	0.244282
0.19357	0.228461
0.183867	0.241431
0.180864	0.23238
0.182454	0.225318
0.187227	0.235803
0.189947	0.255086
0.169333	0.236759
0.185856	0.220978
0.176772	0.2432
0.186065	0.239741
0.196923	0.238314
0.1876	0.242024
0.194648	0.244507
0.208369	0.232901
0.227286	0.234207
0.186152	0.234063
0.19346	0.232676
0.193047	0.243744
0.194174	0.224955
0.247176	0.236394
0.199754	0.2224
0.182629	0.228237
0.17899	0.232052
0.194444	0.23235
0.1915	0.239289
0.20122	0.233063
0.182817	0.237048
0.195032	0.239701
0.190604	0.224313
0.192896	0.240105
0.200571	0.24333
0.206147	0.238465
0.203064	0.24587
0.191212	0.244941
0.222433	0.240524
0.212144	0.227858
0.204469	0.23238
0.220133	0.24172
0.196106	0.2368
0.20352	0.250971
0.209652	0.238907
0.196106	0.231608
0.195771	0.225761
0.175954	0.228644
0.230095	0.236468
0.200381	0.242192
0.2424	0.247564
0.184465	0.236671
0.190694	0.238378
0.1984	0.238421
0.210643	0.247177
0.215467	0.24133
0.210547	0.2392
0.203228	0.238889
0.188182	0.23828
0.19923	0.231309
0.204667	0.234933
0.195254	0.236687
0.1944	0.2388
0.190953	0.241857
0.197747	0.233183
0.205635	0.243277
0.208393	0.238778
0.217971	0.241556
0.195771	0.255552
0.201371	0.233379
0.194759	0.240849
0.191651	0.252925
0.198149	0.23411
0.1864	0.240039
0.1827	0.240114
0.199283	0.230515
0.191373	0.2232
0.186065	0.233434
0.204149	0.233951
0.191867	0.239846
0.200615	0.236446
0.187345	0.223125
0.203226	0.246354
0.1889	0.244339
0.198502	0.250143
0.199393	0.247409
0.208488	0.229015
0.182351	0.234149
0.19649	0.231309
0.194658	0.256964
0.207886	0.244495
0.198497	0.23024
0.210015	0.248589
0.207771	0.232533
0.207709	0.233506
0.248951	0.249764
0.189272	0.24983
0.197915	0.244
0.204703	0.24134
0.1878	0.236043
0.198092	0.235366
0.251154	0.240606
0.205973	0.249634
0.210133	0.242361
0.229973	0.237224
0.220329	0.254839
0.213803	0.253196
0.216381	0.25432
0.221039	0.245156
0.216236	0.268249
0.211463	0.260502
0.215524	0.311958
0.196468	0.312209
0.186009	0.310187
0.168369	0.310582
0.200676	0.309106
0.193047	0.303427
0.179421	0.31605
0.199608	0.293215
0.180571	0.307636
0.201143	0.291689
0.191304	0.289258
0.171236	0.292651
0.168585	0.297947
0.172267	0.297351
0.201419	0.291106
0.188243	0.30636
0.171914	0.302658
0.183724	0.297218
0.179451	0.290096
0.181902	0.291364
0.175076	0.293229
0.192835	0.296919
0.20062	0.290347
0.201067	0.289846
0.178764	0.290294
0.180457	0.285533
0.178489	0.287877
0.191183	0.294128
0.182204	0.29066
0.18624	0.283759
0.190022	0.291556
0.200267	0.297927
0.185018	0.29012
0.186645	0.289985
0.178365	0.281988
0.197046	0.286655
0.185448	0.294076
0.202426	0.272908
0.199808	0.28468
0.199331	0.284524
0.19334	0.271553
0.178944	0.276496
0.194286	0.284453
0.1924	0.433683
0.180457	0.275562
0.167796	0.276583
0.181046	0.282274
0.200862	0.276728
0.186274	0.290307
0.1712	0.27868
0.183579	0.287626
0.184873	0.279397
0.169682	0.273855
0.166281	0.283653
0.159763	0.273943
0.184298	0.289568
0.185714	0.293713
0.179549	0.287284
0.178176	0.283627
0.186227	0.273026
0.180343	0.284077
0.1892	0.303502
0.176933	0.286095
0.177853	0.283441
0.188742	0.296197
0.180153	0.28024
0.189374	0.279667
0.177214	0.283323
0.185151	0.290924
0.192384	0.306163
0.19169	0.286208
0.192	0.295408
0.189568	0.28747
0.204431	0.285941
0.208278	0.298449
0.212364	0.288897
0.19561	0.448489
0.18976	0.295732
0.19261	0.290442
0.197994	0.286851
0.199111	0.278344
0.197733	0.288632
0.205979	0.279844
0.207067	0.282244
0.189074	0.284743
0.209795	0.288129
0.190892	0.273053
0.188604	0.295752
0.18602	0.282451
0.189102	0.277116
0.195256	0.290854
0.19673	0.276062
0.194996	0.285669
0.185427	0.285308
0.187231	0.281182
0.175673	0.287873
0.183547	0.282542
0.190428	0.296998
0.191247	0.278098
0.181248	0.289861
0.189388	0.294089
0.186849	0.28355
0.17666	0.284212
0.1664	0.279939
0.165181	0.278151
0.170017	0.292022
0.191418	0.280638
0.188428	0.286377
0.19059	0.27181
0.195556	0.273723
0.1984	0.275156
0.198512	0.271814
0.188114	0.286184
0.2048	0.286153
0.196308	0.405899
0.172644	0.281521
0.1824	0.280066
0.17589	0.284882
0.1792	0.281311
0.180834	0.284168
0.1748	0.279481
0.180571	0.276088
0.190124	0.284754
0.184114	0.264588
0.173785	0.278984
0.17728	0.271225
0.185498	0.276875
0.190124	0.27426
0.183219	0.291507
0.19561	0.279333
0.186344	0.280817
0.168862	0.282581
0.196876	0.300188
0.18841	0.285995
0.17669	0.286443
0.238994	0.289559
0.201123	0.283944
0.197547	0.28366
0.213964	0.286489
0.186808	0.287839
0.187429	0.290417
0.172173	0.303433
0.206459	0.288
0.176128	0.29444
0.187665	0.287195
0.188185	0.297249
0.188865	0.291284
0.200029	0.301639
0.191069	0.299656
0.205847	0.293895
0.193829	0.310234
0.196218	0.308101
0.175015	0.300714
0.183557	0.289046
0.195657	0.286459
0.199015	0.289452
0.186281	0.281558
0.1856	0.27867
0.200107	0.302322
0.222031	0.284457
0.195129	0.291179
0.195982	0.290719
0.190809	0.287333
0.187291	0.284999
0.192272	0.279211
0.177898	0.274734
0.195982	0.280336
0.192725	0.277333
0.178764	0.295058
0.183467	0.281901
0.181379	0.282426
0.1984	0.282585
0.201658	0.304048
0.18271	0.298165
0.201846	0.296204
0.212329	0.286955
0.196226	0.286605
0.192768	0.286159
0.196771	0.293995
0.20288	0.282788
0.208128	0.285356
0.194708	0.293163
0.177338	0.276137
0.200432	0.278712
0.199913	0.279379
0.185285	0.291179
0.198531	0.288405
0.196352	0.282856
0.198656	0.28266
0.223047	0.302367
0.19283	0.281226
0.192619	0.275766
0.202152	0.276935
0.1904	0.299448
0.189985	0.289548
0.194051	0.288238
0.202072	0.284108
0.188544	0.289789
0.192114	0.292305
0.193412	0.285432
0.199967	0.290292
0.190267	0.297208
0.184875	0.290552
0.213374	0.282753
0.194473	0.395935
0.198519	0.286873
0.21248	0.303745
0.1966	0.278942
0.218585	0.294363
0.198836	0.285058
0.2224	0.294594
0.205029	0.299719
0.213082	0.29118
0.191439	0.305463
0.208682	0.285992
0.195985	0.294769
0.189642	0.291254
0.207382	0.297706
0.19296	0.279826
0.207151	0.3008
0.210585	0.294441
0.202485	0.300635
0.199529	0.293463
0.209948	0.304896
0.18688	0.300681
0.198827	0.311023
0.212455	0.287695
0.201652	0.288151
0.205042	0.300267
0.211451	0.285055
0.211708	0.299305
0.216427	0.29392
0.2184	0.289483
0.205568	0.38808
0.225684	0.28864
0.217458	0.279533
0.205131	0.301806
0.223086	0.283068
0.213876	0.278802
0.194176	0.27759
0.204383	0.297131
0.213295	0.278187
0.215156	0.295768
0.202589	0.28816
0.212907	0.287003
0.211081	0.2816
0.219022	0.280756
0.202112	0.291354
0.215966	0.277023
0.2176	0.281806
0.194676	0.2856
0.184755	0.272381
0.190369	0.278508
0.21287	0.285691
0.180978	0.280152
0.209171	0.286088
0.1912	0.293492
0.189935	0.28054
0.195657	0.286418
0.216471	0.291157
0.189706	0.287096
0.191373	0.288194
0.21181	0.273762
0.203067	0.2762
0.18539	0.297195
0.209636	0.295474
0.209502	0.285867
0.198183	0.292651
0.217078	0.283706
0.199747	0.288686
0.204038	0.293072
0.186683	0.289656
0.203869	0.284472
0.190031	0.28637
0.218683	0.282311
0.218384	0.274604
0.206277	0.2972
0.186227	0.277333
0.200359	0.294712
0.209307	0.290485
0.195146	0.295176
0.201781	0.285694
0.205169	0.296156
0.192738	0.282596
0.1863	0.283092
0.211308	0.303445
0.210489	0.281073
0.212148	0.283964
0.200386	0.277346
0.212229	0.267075
0.218353	0.280067
0.1952	0.291746
0.19136	0.289363
0.196343	0.295634
0.2032	0.284059
0.205371	0.289499
0.211657	0.292876
0.219692	0.291104
0.216229	0.287015
0.200853	0.29252
0.215733	0.278814
0.189274	0.286947
0.198118	0.282433
0.210057	0.278116
0.198267	0.293023
0.21216	0.294169
0.211627	0.2848
0.21371	0.296245
0.1936	0.309516
0.204	0.29913
0.214332	0.290673
0.202165	0.287249
0.200492	0.31159
0.203733	0.305942
0.209467	0.295582
0.191349	0.308667
0.20304	0.29644
0.206691	0.301022
0.1952	0.305705
0.20243	0.301427
0.217851	0.290446
0.214727	0.291388
0.228859	0.2906
0.2072	0.3211
0.197704	0.301418
0.213677	0.292347
0.216131	0.286142
0.2086	0.288308
0.194207	0.311089
0.223155	0.283022
0.222138	0.291137
0.206969	0.290592
0.2157	0.290607
0.212504	0.29028
0.214122	0.298716
0.219815	0.291743
0.2142	0.301333
0.216669	0.293129
0.224931	0.281028
0.213527	0.290976
0.21261	0.301179
0.210314	0.295747
0.225959	0.305657
0.225135	0.291753
0.227037	0.296229
0.216875	0.296727
0.226174	0.298532
0.215424	0.296035
0.219255	0.283293
0.221979	0.303217
0.217484	0.28576
0.237357	0.297226
0.219362	0.293689
0.214445	0.28236
0.22336	0.29147
0.216686	0.296751
0.223624	0.27933
0.215579	0.283852
0.215067	0.284705
0.212634	0.29909
0.21504	0.297666
0.207559	0.288667
0.236	0.308035
0.243537	0.290569
0.209829	0.273998
0.208291	0.293378
0.208	0.295928
0.233404	0.288533
0.210115	0.431575
0.21901	0.288686
0.214971	0.284657
0.216166	0.288209
0.230516	0.285317
0.222091	0.28141
0.213959	0.287162
0.214171	0.287162
0.21696	0.29197
0.249745	0.28694
0.227004	0.287879
0.228	0.300714
0.226176	0.279008
0.214857	0.280368
0.237662	0.28824
0.229145	0.281765
0.252661	0.300883
0.238676	0.301987
0.241147	0.269998
0.225862	0.301908
0.218987	0.28789
0.217375	0.281344
0.242895	0.285303
0.206014	0.2752
0.228221	0.286812
0.219314	0.29899
0.224	0.277102
0.217856	0.382517
0.210596	0.281399
0.223543	0.417848
0.208557	0.27846
0.227514	0.286418
0.22091	0.2866
0.223122	0.280103
0.20689	0.293326
0.219733	0.290234
0.212677	0.280744
0.237929	0.294866
0.215691	0.282099
0.213519	0.283159
0.229415	0.284059
0.218667	0.287053
0.230038	0.289365
0.2072	0.286578
0.206965	0.26543
0.225986	0.272249
0.205804	0.279493
0.225449	0.283995
0.220498	0.290577
0.218752	0.286905
0.232427	0.288746
0.228431	0.279133
0.22176	0.283679
0.216914	0.271306
0.205182	0.281378
0.234215	0.278181
0.20703	0.286076
0.216889	0.274215
0.210207	0.272404
0.226933	0.286965
0.224862	0.279834
0.212457	0.28736
0.213261	0.272999
0.232133	0.280484
0.232055	0.399789
0.200533	0.279914
0.234857	0.292905
0.230154	0.285032
0.225328	0.277093
0.23232	0.279542
0.221156	0.281738
0.22863	0.288956
0.202124	0.301541
0.212506	0.28416
0.22014	0.295491
0.205357	0.285604
0.212455	0.294768
0.206545	0.301553
0.212829	0.291804
0.201794	0.279297
0.215954	0.301796
0.205748	0.292748
0.197818	0.301198
0.193484	0.414262
0.213943	0.420829
0.203938	0.399712
0.208524	0.405067
0.214817	0.398651
0.208356	0.400866
0.215314	0.434991
0.210831	0.442222
0.218193	0.38336
0.247102	0.399779
0.218533	0.402923
0.224996	0.403516
0.229585	0.402688
0.223663	0.39663
0.23207	0.408898
0.23312	0.393682
0.222464	0.400929
0.227502	0.417986
0.212827	0.386224
0.216533	0.411365
0.229522	0.400665
0.236664	0.425685
0.225627	0.408294
0.242631	0.391631
0.246225	0.383195
0.214613	0.379995
0.216158	0.400905
0.225103	0.415127
0.225129	0.400908
0.214715	0.382166
0.219077	0.665544
0.229333	0.375583
0.225858	0.383185
0.207718	0.402856
0.215393	0.407576
0.213029	0.412891
0.215845	0.387669
0.231348	0.409555
0.212754	0.395242
0.213071	0.4252
0.2184	0.384
0.227	0.385652
0.226036	0.390191
0.239543	0.400596
0.2432	0.37624
0.220952	0.396151
0.224853	0.418194
0.210692	0.385124
0.216686	0.366135
0.2304	0.37495
0.204905	0.393899
0.218629	0.391417
0.199595	0.374109
0.21203	0.379942
0.205964	0.369641
0.239441	0.373215
0.232457	0.384644
0.215467	0.383656
0.216836	0.390181
0.218359	0.377363
0.211417	0.380655
0.217745	0.404384
0.216424	0.369857
0.194462	0.370114
0.22553	0.382034
0.221081	0.369751
0.2077	0.378732
0.209992	0.361519
0.210077	0.378008
0.209896	0.360142
0.220533	0.382092
0.223185	0.376646
0.217007	0.390568
0.21446	0.386162
0.226097	0.387244
0.221818	0.375389
0.206348	0.383846
0.240114	0.384944
0.205793	0.395685
0.22086	0.38248
0.222039	0.375358
0.210215	0.403113
0.222915	0.384358
0.238222	0.391432
0.217856	0.39475
0.212193	0.401546
0.215172	0.373166
0.213044	0.383582
0.221388	0.380354
0.228836	0.406243
0.220133	0.38481
0.216192	0.370428
0.1952	0.402597
0.205568	0.389468
0.22686	0.38772
0.215508	0.393813
0.2064	0.39053
0.208686	0.390361
0.208157	0.37705
0.196754	0.401589
0.202667	0.384676
0.218548	0.393143
0.2176	0.422918
0.224	0.402743
0.21513	0.392448
0.208246	0.371042
0.201902	0.387323
0.208107	0.3952
0.208762	0.391654
0.219392	0.397059
0.199696	0.368898
0.2148	0.392865
0.205885	0.374845
0.20416	0.385149
0.206629	0.378832
0.226133	0.393231
0.220469	0.410935
0.221642	0.407702
0.213926	0.425197
0.208622	0.422993
0.209333	0.392985
0.214348	0.420711
0.223508	0.41716
0.210113	0.430459
0.207458	0.415459
0.219225	0.405556
0.216386	0.416311
0.226918	0.386053
0.227265	0.405347
0.219429	0.409849
0.227072	0.40738
0.219904	0.407934
0.22337	0.386338
0.219648	0.387832
0.228465	0.381449
0.209676	0.409515
0.211537	0.396678
0.213527	0.41748
0.218417	0.393837
0.202554	0.39607
0.219077	0.402078
0.213851	0.409865
0.228019	0.413838
0.226428	0.402649
0.225469	0.38799
0.221572	0.402268
0.216055	0.368791
0.235378	0.437243
0.232498	0.398623
0.215718	0.408279
0.242667	0.405234
0.282031	0.404436
0.282892	0.391809
0.277465	0.418743
0.299548	0.374643
0.316405	0.410451
0.286933	0.402336
0.285379	0.389152
0.28836	0.410578
0.274338	0.416844
0.271333	0.416374
0.295056	0.407824
0.314392	0.404759
0.292733	0.405984
0.295706	0.388332
0.275282	0.405937
0.273408	0.391648
0.270526	0.415488
0.289577	0.414677
0.277179	0.414332
0.279982	0.414996
0.299151	0.640831
0.293507	0.409806
0.295178	0.429853
0.302586	0.392104
0.282453	0.41441
0.299435	0.424021
0.287418	0.40163
0.299909	0.408494
0.3044	0.389836
0.302258	0.379219
0.323156	0.414756
0.3024	0.399195
0.302205	0.4288
0.283879	0.398264
0.300571	0.398975
0.303026	0.404895
0.321116	0.401755
0.3088	0.385801
0.292752	0.38916
0.30071	0.399176
0.320944	0.395666
0.314824	0.376173
0.308013	0.411666
0.305146	0.395058
0.283337	0.388488
0.299367	0.396602
0.300149	0.368612
0.307771	0.399352
0.298567	0.38559
0.327314	0.403733
0.302553	0.412319
0.292836	0.384351
0.289413	0.400243
0.3008	0.416721
0.3243	0.369103
0.294674	0.382609
0.293966	0.382512
0.32576	0.389835
0.311761	0.384117
0.303626	0.386256
0.306091	0.388308
0.286958	0.378395
0.286277	0.40797
0.311868	0.390021
0.290783	0.399313
0.305655	0.388133
0.302618	0.400869
0.308719	0.425161
0.295718	0.397916
0.298904	0.385553
0.294868	0.389609
0.324488	0.391102
0.29177	0.398334
0.299581	0.420884
0.301714	0.387536
0.276727	0.407692
0.294191	0.397697
0.295788	0.408405
0.309929	0.399921
0.302789	0.408731
0.308463	0.40316
0.315154	0.381754
0.295771	0.382115
0.317721	0.386261
0.306438	0.394263
0.318183	0.38656
0.305067	0.400571
0.330613	0.397085
0.308781	0.386613
0.301414	0.383961
0.311543	0.398196
0.304113	0.391942
0.314815	0.382727
0.33504	0.391688
0.294262	0.398549
0.324033	0.394654
0.324962	0.398265
0.33128	0.386902
0.319747	0.65961
0.296115	0.376378
0.305244	0.405178
0.312209	0.396557
0.326967	0.409392
0.3136	0.392521
0.303473	0.39948
0.345143	0.367751
0.32296	0.383513
0.324622	0.396523
0.293209	0.381321
0.291417	0.392521
0.323069	0.39132
0.309433	0.397209
0.300579	0.398549
0.32016	0.404848
0.321905	0.407224
0.334044	0.401647
0.3224	0.398869
0.307475	0.391186
0.316121	0.389243
0.308671	0.385338
0.312487	0.36812
0.330459	0.394905
0.335822	0.402319
0.334039	0.386664
0.323235	0.394977
0.32694	0.400494
0.330331	0.412299
0.327585	0.392844
0.330574	0.393528
0.322078	0.403795
0.310778	0.38907
0.32296	0.399769
0.329067	0.394459
0.339767	0.391119
0.302163	0.393619
0.318595	0.397591
0.308663	0.401696
0.329412	0.382261
0.295543	0.392037
0.294208	0.402139
0.319369	0.412082
0.334641	0.40195
0.303074	0.423895
0.335127	0.387003
0.319212	0.403128
0.299081	0.42836
0.326295	0.40038
0.312675	0.428116
0.299591	0.415356
0.305809	0.404081
0.324394	0.425518
0.314842	0.422563
0.29479	0.426821
0.30957	0.420901
0.320451	0.434708
0.304114	0.415493
0.317422	0.410788
0.329029	0.425259
0.322981	0.439847
0.286171	0.43392
0.293929	0.41996
0.287211	0.419014
0.3168	0.681655
0.288261	0.402344
0.297253	0.41119
0.291515	0.43051
0.305579	0.419135
0.31106	0.408082
0.270841	0.404415
0.295467	0.39502
0.284379	0.390774
0.284079	0.389835
0.307088	0.38703
0.296255	0.392421
0.287492	0.404185
0.280305	0.399515
0.279296	0.40607
0.287842	0.396992
0.305742	0.383053
0.316138	0.373645
0.290723	0.417297
0.282813	0.412589
0.278896	0.408606
0.298602	0.403159
0.31424	0.398002
0.304213	0.398763
0.291635	0.411844
0.289496	0.392805
0.303965	0.389371
0.301977	0.413303
0.288077	0.403239
0.302222	0.425045
0.29332	0.387255
0.303884	0.442032
0.29898	0.417944
0.28928	0.41884
0.291915	0.432463
0.284839	0.413257
0.279242	0.408829
0.281745	0.394629
0.295031	0.421698
0.282632	0.403356
0.289236	0.632856
0.295627	0.418935
0.277843	0.427678
0.290831	0.419221
0.292899	0.401912
0.292761	0.416243
0.291716	0.411496
0.294119	0.421952
0.299362	0.4148
0.300975	0.42508
0.296503	0.391991
0.30931	0.432697
0.298556	0.423822
0.294476	0.408375
0.280704	0.413893
0.294141	0.420508
0.299345	0.404771
0.315236	0.418013
0.291137	0.406339
0.275472	0.395815
0.299953	0.423422
0.285538	0.386793
0.282232	0.397916
0.297902	0.365427
0.307113	0.394432
0.31638	0.402153
0.310025	0.42081
0.30432	0.386899
0.298831	0.393744
0.293748	0.38068
0.298805	0.402297
0.292389	0.397939
0.287568	0.421446
0.289034	0.411291
0.304668	0.404286
0.305882	0.40701
0.299093	0.391091
0.298265	0.420099
0.305432	0.397219
0.298922	0.399411
0.308163	0.408646
0.297964	0.395074
0.295345	0.376845
0.295174	0.413391
0.28448	0.419776
0.288259	0.408105
0.300905	0.415352
0.298478	0.410608
0.311162	0.590769
0.297524	0.404518
0.284839	0.402
0.287142	0.399214
0.268881	0.427636
0.295713	0.387678
0.3032	0.41136
0.295849	0.396963
0.280345	0.398552
0.305418	0.41252
0.283417	0.429263
0.322715	0.398471
0.294631	0.418695
0.289927	0.409397
0.290259	0.406897
0.312491	0.390995
0.309773	0.402092
0.311751	0.43634
0.298457	0.409759
0.294621	0.406142
0.283478	0.407024
0.288	0.424694
0.289026	0.420738
0.285984	0.402212
0.293475	0.4096
0.291774	0.417782
0.300958	0.414059
0.301533	0.382464
0.301498	0.397162
0.284543	0.40478
0.294953	0.401754
0.316668	0.413228
0.299719	0.388104
0.305462	0.388206
0.28897	0.389825
0.298791	0.39779
0.273719	0.406626
0.266831	0.63866
0.293803	0.414143
0.304514	0.404273
0.312519	0.403895
0.296557	0.389815
0.293497	0.624898
0.293618	0.395745
0.295219	0.401527
0.30019	0.396583
0.311083	0.398409
0.290607	0.429037
0.301638	0.408645
0.28595	0.394839
0.305313	0.27166
0.289103	0.274215
0.300596	0.296206
0.2936	0.280432
0.293085	0.270195
0.293229	0.273164
0.309965	0.27865
0.288085	0.276458
0.302024	0.260927
0.311759	0.277094
0.280511	0.292613
0.314514	0.276647
0.298724	0.274888
0.299551	0.26926
0.299083	0.261795
0.2912	0.268853
0.292899	0.275248
0.283665	0.714482
0.302238	0.275143
0.284288	0.250596
0.286761	0.269064
0.29999	0.264515
0.315936	0.263273
0.304254	0.263023
0.293851	0.253077
0.303238	0.249248
0.311584	0.266081
0.295624	0.266963
0.305124	0.262637
0.310206	0.239829
0.314217	0.265002
0.29264	0.273209
0.304229	0.699809
0.286142	0.248
0.276742	0.262969
0.287348	0.256427
0.299273	0.2642
0.308953	0.362214
0.294694	0.264413
0.288065	0.239134
0.290105	0.257103
0.28987	0.268522
0.299138	0.257819
0.291677	0.269893
0.2976	0.259507
0.284945	0.2536
0.285559	0.239304
0.297722	0.2592
0.290353	0.25024
0.291716	0.251467
0.29978	0.259899
0.300211	0.269589
0.283874	0.247333
0.289422	0.254857
0.284178	0.26048
0.288655	0.244816
0.301082	0.258247
0.301689	0.245547
0.302441	0.242204
0.298995	0.252467
0.291606	0.251633
0.292	0.25546
0.298306	0.260185
0.304176	0.248665
0.290106	0.268099
0.314529	0.259394
0.319086	0.248898
0.288692	0.265412
0.299348	0.254704
0.301391	0.247411
0.294832	0.258893
0.282409	0.256914
0.280741	0.249667
0.290731	0.258923
0.290667	0.247567
0.269544	0.253894
0.297039	0.247924
0.299144	0.258462
0.297684	0.259902
0.287744	0.23644
0.315886	0.24344
0.302603	0.260987
0.304036	0.242347
0.306464	0.246359
0.292547	0.245544
0.290222	0.245358
0.295289	0.250358
0.285257	0.250133
0.285967	0.257021
0.275523	0.278725
0.289311	0.274947
0.297825	0.253996
0.301642	0.23872
0.300336	0.255926
0.294212	0.263014
0.299989	0.24339
0.292089	0.255859
0.304346	0.240974
0.325574	0.253975
0.322297	0.264174
0.284884	0.244131
0.293735	0.240512
0.282653	0.238263
0.300505	0.264727
0.280503	0.262457
0.2808	0.272
0.304907	0.2592
0.289928	0.248145
0.290517	0.241388
0.306432	0.241751
0.296565	0.244317
0.28904	0.245983
0.295385	0.264533
0.282851	0.240223
0.277647	0.256453
0.290844	0.346006
0.2798	0.246786
0.286193	0.260928
0.287728	0.258639
0.297501	0.244341
0.305951	0.243311
0.28721	0.236038
0.292188	0.244884
0.277113	0.245115
0.292724	0.240025
0.296835	0.253885
0.29584	0.249708
0.277884	0.2496
0.292114	0.234876
0.284343	0.229209
0.2752	0.243667
0.287229	0.25238
0.298907	0.347822
0.285296	0.343354
0.273422	0.226937
0.262644	0.227942
0.291778	0.246481
0.285292	0.247881
0.283014	0.238527
0.28572	0.233679
0.295733	0.250311
0.304655	0.241815
0.305288	0.260883
0.287915	0.2432
0.288727	0.249157
0.309778	0.238519
0.289964	0.24735
0.292583	0.237098
0.303827	0.239316
0.300983	0.240166
0.303878	0.360858
0.310946	0.380213
0.327277	0.235225
0.315757	0.338126
0.299098	0.366536
0.304654	0.250492
0.328406	0.232474
0.327102	0.24682
0.305903	0.340406
0.288249	0.248
0.29548	0.240608
0.298867	0.227869
0.309831	0.235589
0.319109	0.246317
0.316132	0.244685
0.325583	0.240868
0.312832	0.256807
0.30321	0.237046
0.316067	0.250053
0.30162	0.240896
0.294571	0.2472
0.301972	0.235002
0.289343	0.251641
0.299733	0.245455
0.309954	0.231186
0.315636	0.239302
0.310766	0.337535
0.294488	0.23937
0.298323	0.2464
0.316493	0.23059
0.31	0.237325
0.296242	0.227224
0.296344	0.235126
0.315977	0.221329
0.2952	0.235107
0.281347	0.241614
0.306947	0.256188
0.320206	0.23985
0.319629	0.232424
0.319675	0.222332
0.305037	0.230548
0.296054	0.231218
0.298108	0.227665
0.309711	0.233194
0.302097	0.233493
[truncated: 1,158 more rows]
