# Supplementary material for: Pre-complexation of talin and vinculin without tension is required for efficient nascent adhesion maturation
Source: eLife. 2021 Mar 30;10:e66151. doi: 10.7554/eLife.66151 (PMC8009661; doi:10.7554/eLife.66151)
Supplement: Figure 5—source data 4. [file elife-66151-fig5-data4.xlsx]

## Sheet: Sheet1
Row	Total Integrated Traction (nN)	Error Negative	Error Positive
R8-mutant	94.4613	3.49982	3.49982
WT-rescue	206.256	6.65946	6.65946
