# Supplementary material for: Pre-complexation of talin and vinculin without tension is required for efficient nascent adhesion maturation
Source: eLife. 2021 Mar 30;10:e66151. doi: 10.7554/eLife.66151 (PMC8009661; doi:10.7554/eLife.66151)
Supplement: Figure 5—source data 6. [file elife-66151-fig5-data6.xlsx]

## Sheet: Sheet1
Row	Median (Pa)	Upper Adjacent Value	Lower Adjacent Value	Upper Whisker	Lower Whisker	Outlier
R8vvv-mNG (N=5)	0.270325	0.319829	0.18957	0.299519	0.18957
WT-talin1 (N=7)	0.369825	0.539401	0.247903	0.417958	0.247903
