# Supplementary material for: Pre-complexation of talin and vinculin without tension is required for efficient nascent adhesion maturation
Source: eLife. 2021 Mar 30;10:e66151. doi: 10.7554/eLife.66151 (PMC8009661; doi:10.7554/eLife.66151)
Supplement: Figure 6—source data 1. [file elife-66151-fig6-data1.xlsx]

## Sheet: Sheet1
Talin1 R8vvv-G1 _ 1	Talin1 R8vvv-G1 _ 2	Talin1 R8vvv-G1 _ 3	Talin1 R8vvv-G1 _ 4	Talin1 R8vvv-G1 _ 5	Talin1 R8vvv-G1 _ 6	Talin1 R8vvv-G1 _ 7	Talin1 R8vvv-G1 _ 8	Talin1 R8vvv-G1 _ 9	Talin1 R8vvv-G1 _ 10	Talin1 R8vvv-G1 _ 11	Talin1 R8vvv-G1 _ 12	Talin1 R8vvv-G1 _ 13	Talin1 R8vvv-G1 _ 14	Talin1 R8vvv-G1 _ 15	Talin1 R8vvv-G1 _ 16	Talin1 R8vvv-G1 _ 17	Talin1 R8vvv-G1 _ 18	Talin1 R8vvv-G1 _ 19	Talin1 R8vvv-G1 _ 20	Talin1 R8vvv-G1 _ 21	Talin1 R8vvv-G1 _ 22	Talin1 R8vvv-G1 _ 23	Talin1 R8vvv-G1 _ 24	Talin1 R8vvv-G1 _ 25	Talin1 R8vvv-G1 _ 26	Talin1 R8vvv-G1 _ 27	Talin1 R8vvv-G1 _ 28	Talin1 R8vvv-G1 _ 29	Talin1 R8vvv-G1 _ 30	Talin1 R8vvv-G1 _ 31	Talin1 R8vvv-G1 _ 32	Talin1 R8vvv-G1 _ 33	Talin1 R8vvv-G1 _ 34	Talin1 R8vvv-G1 _ 35	Talin1 R8vvv-G1 _ 36	Talin1 R8vvv-G1 _ 37	Talin1 R8vvv-G1 _ 38	Talin1 R8vvv-G1 _ 39	Talin1 R8vvv-G1 _ 40	Talin1 R8vvv-G1 _ 41	Talin1 R8vvv-G1 _ 42	Talin1 R8vvv-G1 _ 43	Talin1 R8vvv-G1 _ 44	Talin1 R8vvv-G1 _ 45	Talin1 R8vvv-G1 _ 46	Talin1 R8vvv-G1 _ 47	Talin1 R8vvv-G1 _ 48	Talin1 R8vvv-G1 _ 49	Talin1 R8vvv-G1 _ 50
0	8	0	-64	-2	-26	0	0	-56	-20	-18	0	2	-12	-26	-6	-12	-98	-98	-100	-68	0	0	-64	0	-2	-34	-70	0	-34	-4	-70	-62	-54	-4	-12	-6	-2	-18	-18	-12	-16	12	-36	-104	-70	-38	-10	-18	-76
[truncated: 1,346 more columns]
