# Supplementary material for: Pre-complexation of talin and vinculin without tension is required for efficient nascent adhesion maturation
Source: eLife. 2021 Mar 30;10:e66151. doi: 10.7554/eLife.66151 (PMC8009661; doi:10.7554/eLife.66151)
Supplement: Figure 6—source data 2. [file elife-66151-fig6-data2.xlsx]

## Sheet: Sheet1
Talin1 R8vvv-G1 _ 1	Talin1 R8vvv-G1 _ 2	Talin1 R8vvv-G1 _ 3	Talin1 R8vvv-G1 _ 4	Talin1 R8vvv-G1 _ 5	Talin1 R8vvv-G1 _ 6	Talin1 R8vvv-G1 _ 7	Talin1 R8vvv-G1 _ 8	Talin1 R8vvv-G1 _ 9	Talin1 R8vvv-G1 _ 10	Talin1 R8vvv-G1 _ 11	Talin1 R8vvv-G1 _ 12	Talin1 R8vvv-G1 _ 13	Talin1 R8vvv-G1 _ 14	Talin1 R8vvv-G1 _ 15	Talin1 R8vvv-G1 _ 16	Talin1 R8vvv-G1 _ 17	Talin1 R8vvv-G1 _ 18	Talin1 R8vvv-G1 _ 19	Talin1 R8vvv-G1 _ 20	Talin1 R8vvv-G1 _ 21	Talin1 R8vvv-G1 _ 22	Talin1 R8vvv-G1 _ 23	Talin1 R8vvv-G1 _ 24	Talin1 R8vvv-G1 _ 25	Talin1 R8vvv-G1 _ 26	Talin1 R8vvv-G1 _ 27	Talin1 R8vvv-G1 _ 28	Talin1 R8vvv-G1 _ 29	Talin1 R8vvv-G1 _ 30	Talin1 R8vvv-G1 _ 31	Talin1 R8vvv-G1 _ 32	Talin1 R8vvv-G1 _ 33	Talin1 R8vvv-G1 _ 34	Talin1 R8vvv-G1 _ 35	Talin1 R8vvv-G1 _ 36	Talin1 R8vvv-G1 _ 37	Talin1 R8vvv-G1 _ 38	Talin1 R8vvv-G1 _ 39	Talin1 R8vvv-G1 _ 40	Talin1 R8vvv-G1 _ 41	Talin1 R8vvv-G1 _ 42	Talin1 R8vvv-G1 _ 43	Talin1 R8vvv-G1 _ 44	Talin1 R8vvv-G1 _ 45	Talin1 R8vvv-G1 _ 46	Talin1 R8vvv-G1 _ 47	Talin1 R8vvv-G1 _ 48	Talin1 R8vvv-G1 _ 49	Talin1 R8vvv-G1 _ 50
17.7179	-9.12322	-11.7707	36.5945	16.0525	-6.42558	-6.42558	28.9637	23.5663	-0.724991	12.8518	9.81533	8.81993	-7.54943	0.357847	1.69418	-6.42558	2.46718	-6.42558	-6.42558	0.357847	37.7831	33.2691	36.3537	37.7831	33.2691	286.674	-3.62485	33.2691	37.7831	-6.42558	-17.7057	17.0368	37.7831	37.7831	12.8572	6.94448	16.9432	21.7585	37.7831	3.92994	5.72075	5.72075	118.523	-4.9077	93.8403	-4.78837	38.333	16.0297	6.99667
[truncated: 1,172 more columns]
