# Supplementary material for: Pre-complexation of talin and vinculin without tension is required for efficient nascent adhesion maturation
Source: eLife. 2021 Mar 30;10:e66151. doi: 10.7554/eLife.66151 (PMC8009661; doi:10.7554/eLife.66151)
Supplement: Figure 6—source data 3. [file elife-66151-fig6-data3.xlsx]

## Sheet: Sheet1
Talin1 R8vvv-G1 _ 1	Talin1 R8vvv-G1 _ 2	Talin1 R8vvv-G1 _ 3	Talin1 R8vvv-G1 _ 4	Talin1 R8vvv-G1 _ 5	Talin1 R8vvv-G1 _ 6	Talin1 R8vvv-G1 _ 7	Talin1 R8vvv-G1 _ 8	Talin1 R8vvv-G1 _ 9	Talin1 R8vvv-G1 _ 10	Talin1 R8vvv-G1 _ 11	Talin1 R8vvv-G1 _ 12	Talin1 R8vvv-G1 _ 13	Talin1 R8vvv-G1 _ 14	Talin1 R8vvv-G1 _ 15	Talin1 R8vvv-G1 _ 16	Talin1 R8vvv-G1 _ 17	Talin1 R8vvv-G1 _ 18	Talin1 R8vvv-G1 _ 19	Talin1 R8vvv-G1 _ 20	Talin1 R8vvv-G1 _ 21	Talin1 R8vvv-G1 _ 22	Talin1 R8vvv-G1 _ 23	Talin1 R8vvv-G1 _ 24	Talin1 R8vvv-G1 _ 25	Talin1 R8vvv-G1 _ 26	Talin1 R8vvv-G1 _ 27	Talin1 R8vvv-G1 _ 28	Talin1 R8vvv-G1 _ 29	Talin1 R8vvv-G1 _ 30	Talin1 R8vvv-G1 _ 31	Talin1 R8vvv-G1 _ 32	Talin1 R8vvv-G1 _ 33	Talin1 R8vvv-G1 _ 34	Talin1 R8vvv-G1 _ 35	Talin1 R8vvv-G1 _ 36	Talin1 R8vvv-G1 _ 37	Talin1 R8vvv-G1 _ 38	Talin1 R8vvv-G1 _ 39	Talin1 R8vvv-G1 _ 40	Talin1 R8vvv-G1 _ 41	Talin1 R8vvv-G1 _ 42	Talin1 R8vvv-G1 _ 43	Talin1 R8vvv-G1 _ 44	Talin1 R8vvv-G1 _ 45	Talin1 R8vvv-G1 _ 46	Talin1 R8vvv-G1 _ 47	Talin1 R8vvv-G1 _ 48	Talin1 R8vvv-G1 _ 49	Talin1 R8vvv-G1 _ 50
17.823	145.118	51.4917	0.972631	39.544	52.3484	52.3484	20.1153	82.586	30.6553	21.9549	45.0304	33.3123	79.5143	54.6708	283.294	52.3484	64.5013	52.3484	52.3484	54.6708	65.6604	146.048	68.5912	65.6604	146.048	25.1649	12.0857	146.048	65.6604	52.3484	36.2914	6.85309	65.6604	65.6604	127.753	186.522	1.37012	78.1471	65.6604	413.031	107.411	107.411	22.4494	398.726	111.039	278.739	47.5616	121.324	36.2492
[truncated: 1,172 more columns]
