# Supplementary material for: Pre-complexation of talin and vinculin without tension is required for efficient nascent adhesion maturation
Source: eLife. 2021 Mar 30;10:e66151. doi: 10.7554/eLife.66151 (PMC8009661; doi:10.7554/eLife.66151)
Supplement: Figure 7—source data 1. [file elife-66151-fig7-data1.xlsx]

## Sheet: Sheet1
R8vvv-G1_ 1	R8vvv-G1_ 2	R8vvv-G1_ 3	R8vvv-G1_ 4	R8vvv-G1_ 5	R8vvv-G1_ 6	R8vvv-G1_ 7	R8vvv-G1_ 8	R8vvv-G1_ 9	R8vvv-G1_ 10	R8vvv-G1_ 11	R8vvv-G1_ 12	R8vvv-G1_ 13	R8vvv-G1_ 14	R8vvv-G1_ 15	R8vvv-G1_ 16	R8vvv-G1_ 17	R8vvv-G1_ 18	R8vvv-G1_ 19	R8vvv-G1_ 20	R8vvv-G1_ 21	R8vvv-G1_ 22	R8vvv-G1_ 23	R8vvv-G1_ 24	R8vvv-G1_ 25	R8vvv-G1_ 26	R8vvv-G1_ 27	R8vvv-G1_ 28	R8vvv-G1_ 29	R8vvv-G1_ 30	R8vvv-G1_ 31	R8vvv-G1_ 32	R8vvv-G1_ 33	R8vvv-G1_ 34	R8vvv-G1_ 35	R8vvv-G1_ 36	R8vvv-G1_ 37	R8vvv-G1_ 38	R8vvv-G1_ 39	R8vvv-G1_ 40	R8vvv-G1_ 41	R8vvv-G1_ 42	R8vvv-G1_ 43	R8vvv-G1_ 44	R8vvv-G1_ 45	R8vvv-G1_ 46	R8vvv-G1_ 47	R8vvv-G1_ 48	R8vvv-G1_ 49	R8vvv-G1_ 50
2.58095	3.58095	1.0381	0.733333	3.97143	1.92234	2.99048	2.11429	9.65568	12.0635	8.1348	0.247619	3.3619	13.8089	9.55556	3.42857	1.26667	1.04762	9.70476	13.6857	1.70476	4.00952	3.6044	29.8222	7.27326	3.08571	0.904762	6.27106	8.79192	11.6444	8.46667	1.69697	6.89524	1.85714	2.73333	12.2784	3.31429	1.24762	20.634	1.65967	11.3407	1.46387	1.45455	4.41026	3	8.74286	7.55556	14.3619	3.0652	5.24762
[truncated: 1,511 more columns]
