# Supplementary material for: Pre-complexation of talin and vinculin without tension is required for efficient nascent adhesion maturation
Source: eLife. 2021 Mar 30;10:e66151. doi: 10.7554/eLife.66151 (PMC8009661; doi:10.7554/eLife.66151)
Supplement: Figure 7—source data 2. [file elife-66151-fig7-data2.xlsx]

## Sheet: Sheet1
R8vvv-G1_ 1	R8vvv-G1_ 2	R8vvv-G1_ 3	R8vvv-G1_ 4	R8vvv-G1_ 5	R8vvv-G1_ 6	R8vvv-G1_ 7	R8vvv-G1_ 8	R8vvv-G1_ 9	R8vvv-G1_ 10	R8vvv-G1_ 11	R8vvv-G1_ 12	R8vvv-G1_ 13	R8vvv-G1_ 14	R8vvv-G1_ 15	R8vvv-G1_ 16	R8vvv-G1_ 17	R8vvv-G1_ 18	R8vvv-G1_ 19	R8vvv-G1_ 20	R8vvv-G1_ 21	R8vvv-G1_ 22	R8vvv-G1_ 23	R8vvv-G1_ 24	R8vvv-G1_ 25	R8vvv-G1_ 26	R8vvv-G1_ 27	R8vvv-G1_ 28	R8vvv-G1_ 29	R8vvv-G1_ 30	R8vvv-G1_ 31	R8vvv-G1_ 32	R8vvv-G1_ 33	R8vvv-G1_ 34	R8vvv-G1_ 35	R8vvv-G1_ 36	R8vvv-G1_ 37	R8vvv-G1_ 38	R8vvv-G1_ 39	R8vvv-G1_ 40	R8vvv-G1_ 41	R8vvv-G1_ 42	R8vvv-G1_ 43	R8vvv-G1_ 44	R8vvv-G1_ 45	R8vvv-G1_ 46	R8vvv-G1_ 47	R8vvv-G1_ 48	R8vvv-G1_ 49	R8vvv-G1_ 50
112	108	92	90	88	84	76	76	72	68	68	64	62	60	58	54	52	52	50	46	44	44	44	40	40	40	40	40	38	38	38	36	36	34	34	34	34	32	32	32	30	30	30	28	28	28	28	28	26	26
[truncated: 1,010 more columns]
