# Supplementary material for: Pre-complexation of talin and vinculin without tension is required for efficient nascent adhesion maturation
Source: eLife. 2021 Mar 30;10:e66151. doi: 10.7554/eLife.66151 (PMC8009661; doi:10.7554/eLife.66151)
Supplement: Figure 7—source data 3. [file elife-66151-fig7-data3.xlsx]

## Sheet: Sheet1
R8vvv G2	WT talin1 G2
98	533
66	551.243
52	102
49	220.071
80	68
48	180
60	267
78	103
143	274.678
98	236
62	93
74	520
107.852	137
59.5869	148
235.913	68
77	101
50	438
91	99.8429
249.812	141
51	533
72	103
116.544	337
64	172
95.7276	448
45	84
46	148
93.2303	96
52	109
106	204
60	72
49	335.948
49	77
49	70
143.22	69
48	145
46	281
111	127
76	332
95	133
72	94.0327
51.1583	147
73	106
112	153
145.084	144.99
97	552
268.16	261
129.1	73
46	68
56	159.764
93	149
59	233
46	181
82	74
59	64.8712
74.6479	136
166.853	140
69	133
59	90
43	62
58	162.571
82	81
73	102
43	103
54	82
122.369	102
91	125
50	79
55	156
132	223.325
102	132
74	125
42	123
69.8754	464
68	146
50	95
44	61
163.871	197
79	337
56	194
65	89
134	76
43	73
72	267
133	82
68	71
168.284	199
56	76
64	63
52.9784	65
49	405
76	70
170.393	222
46	82.6232
91.6068	129.88
51	368
125.177	63
71	224.969
63	78
65	74
43	379
60	358
47	375.902
56	293
74	121
45	170
75	189.247
56	92
133	175
43	137
69	319
49	116
102	141
67	164
62	340.372
80	71
114	135
103	72.955
42	473.01
44	100
66	75
88	109
133.392	280
46	191
53	172
44	61
84	260
43	64
49	94
44	132
46	85
172.008	95
66	190
45	77
177.001	109
49	178
45	359
122.327	379
75.68	361.574
58	411
64	450.745
268.381	87
58	123
61	138
54	111
47	164
88.343	213.18
62	148.955
87	110
239.93	298
59	110
65.6532	227
131.992	233
51	74
48	81
56	100
44	329.883
104	86
88	70
56	69
95	222
50	132
53	209
275	167
98.0817	92
74	246
46	499
71	201
45	61
63	147
193.826	157
55.0867	75
77	223.965
197.827	128
73	103
48.1476	80
45	249.608
62	74
56	242.284
43	534
56	126.116
156.307	98
46	165
140.158	200
45	284
48	70
174	218
83	73
45	151
56	131
106	96
46	63
54	73
45	479
87	221.647
85	437
69	361
51	271.331
60	82
44	203
44	66
46	249
60	81
43	330.573
43	65
65	88
68	304.372
95	131
55	72
46	169.985
104	69
47	419
80	383
59	108
66	67
62	64
102.268	437
44	128
62	371
61	164
54	62
86	62
49	145
56	101
51	235.345
67	93
231.751	248
55	215
52	97
57	243
45	71
78.559	155
79.8635	102
46	216
141	193
63	70
52	181
115	146
51.612	63
56	63
46	122
62.4155	168
52	92
127.068	108
75	70
64	172
127	128
56	427.166
142	533.34
43	132
45	434.345
58	249
71	84
70	172
214.91	69
85	88
137.196	500.337
70	112.921
46	233.806
93	229
152.458	63
98.5001	87
47	81
43	96
144.127	150
43	123
86	63
79	168
181.18	125
49	152
49	70
46	92
66.8966	138
46	102.218
133.072	77
52	201
158.569	79
55	83
64	221
60	508
46	66
47	320
165.957	91
247.205	111
71.7917	265.849
50	204
66	112
183	104
50	261
43	371
133.484	133
45	376
60	97
65.3663	533
76	416
59	442
54	70
56	128
46	195
231.353	177
46	116
71	148
61.1149	482.214
50	77
55	123
56	133
89.6431	78
62	166
111.723	65
48.7846	213.697
211.764	138
114	78
46	444
91	96
60	87
76	66
47	88
54	80
44	218
60	212
89	62
106	259.219
49	148
68	183
274.224	220
93.167	139
152.612	494.512
92	278
62	395
45	193
142	255.434
52	103
82	168
56	71
129	73
46	110.254
142	70
59	65
51	74
79	271.213
51	73
116	143
56	88
43	121
99	166
143.512	520
133	138
112	69
49	281
48	127
51	204
52	173
193.23	148
127	125
248.279	78
68	86
44	227
63	81
46	91
98	74
166.138	191
78	299
54	104.41
45	261
58	411
45	115
113.223	261
42	239
45	73
46	71
60	249
56	157
51	293
63	72
50	447
75.0565	106
52	110
63	63
45	79
42	89
110	164
112	144
76.1801	100.716
55	132
198.151	326
215.439	533
59	121
100.796	77
85	79
116	201
47	158
68	155.962
168.186	144
76	132
52	145
48	75
85	413
44	235
251.571	261
53	490.163
74	280
56	98
82	80
59	80
73	335.211
50	80
46	224
72	61
77	129
146.773	108
51	238
136.971	172
46.0687	166
85	552
45	365.147
114	533
78	87.2396
51	533
98	94
82	442
60	190
50	77
119	113
56	451.26
64	69
108	340
142.272	87.4425
55	91
49	182
44	63
48	76
	515
	63
	257.577
	119
	219.761
	110
	95.6498
	166
	65
	303
	371
	140
	75.9842
	113
	159
	323
	194
	94
	469
	403.758
	411
	159
	75
	98
	172
	129
	283
	223.181
	80
	78
	61
	143
	95
	235.826
	157
	164
	125
	415.525
	61
	62
	113
	222
	325.067
	215
	369
	223
	84
	304
	270
	92
	153
	91
	105
	79
	108
	193.278
	74
	297.176
	523
	178
	126
	129
	284
	335
	66
	94
	159
	448
	135
	178
	82
	73
	70
	86
	413.963
	65
	77
	454
	106
	62
	84
	64
	71
	139
	77
	315.958
	137
	92
	172
	235
	71
	133
	84
	396
	77
	155
	552
	170
	69
	152
	65
	99
	76
	398.44
	201
	196.058
	131
	278
	110
	246
	258
	219
	140.813
	240
	122
	181
	371
	276
	80
	280
	324
	208
	79
	145
	362.863
	533
	98
	468.808
	552
	72
	85
	69
	132
	74
	107
	162
	69
	101
	458.337
	503
	411
	129
	92
	68
	62
	413
	67
	523
	233.276
	197
	124
	243
	544.822
	181
	100
	64
	237
	138
	202
	158
	84
	101
	77
	226
	277
	115
	79
	80
	521.671
	176
	119
	96
	358
	466.072
	73
	138
	91
	236
	73
	62
	63
	105
	283.405
	81
	74
	371
	421
	74
	306
	328
	62
	158
	138
	155
	281
	301.923
	180
	74
	70
	167
	73
	71
	552
	301
	243
	209
	91
	88
	94
	324
	78
	165
	225
	96
	120
	76
	87
	462
	278
	133
	76
	177.141
	371
	78
	552
	167
	370
	156
	289
	80
	74
	298
	101
	109
	148
	80
	71
	65
	65
	191
	144.393
	261
	208
	109
	172
	229
	116
	69
	398
	132
	274
	62
	256
	71
	130
	522
	189
	241
	201
	76
	87
	63
	307
	223
	77
	103
	263.724
	450.498
	96
	320.448
	217.025
	95
	77
	145
	87
	228.714
	257
	202.786
	533
	94
	306
	90
	230
	200
	73
	183
	358
	390
	106.015
	103
	119.628
	194
	148
	472.077
	68
	82
	82
	337
	220
	191
	99
	121
	86
	439.245
	338
	87
	105
	71
	264.037
	121
	118
	68
	208
	450
	178
	62
	161.557
	70
	104
	96
	62
	138
	72
	86
	338
	64
	65
	98
	63
	182
	134
	201
	99
	266.41
	110
	143
	150
	132.549
	145
	110
	199
	168
	201
	293
	121
	552
	68
	120
	334
	107
	375.329
	202
	66
	79
	189
	349.04
	78
	87.4382
	317.102
	81
	274.724
	315
	158
	191
	293
	73
	145
	219
	87
	210
	144.57
	165
	316.239
	552
	65
	235
	151
	552
	113
	193
	84
	77
	80
	369
	62
	109
	293
	149.72
	429
	141
	107
	324
	534
	222
	67
	180
	122
	63
	263.38
	240
	65
	170
	164
	229
	226
	332
	119
	79
	96
	110
	226.288
	298.294
	70
	204
	167
	233
	95
	168
	152
	221.58
	72
	181
	266.739
	62
	182
	390
	498
	72
	193
	69
	99
	64
	405
	147
	220
	116
	86
	65
	76
	287
	84
	68
	202
	121
	156
	107
	227
	121
	233
	208
	87
	149
	241
	70
	62
	131
	61
	131
	103.244
	163
	123
	282.841
	108
	150
	381.455
	388
	147
	83
	104
	235.808
	533
	125
	297
	120
	68
	82
	106
	243
	67
	320
	106
	251
	79
	183
	224
	117
	84
	421.31
	102
	69
	164.757
	150
	126
	66
	139
	71
	70
	139
	327.328
	93
	92
	86
	68
	111
	158
	146
	148
	68
	71
	551.15
	152
	86
	74
	156
	98
	146
	95
	104
	100
	72.9931
	390.689
	274.841
	481
	119
	104
	207
	231
	222
	85
	130
	159
	66
	159
	166
	116
	145
	68
	62
	67
	115
	173
	70
	71
	129
	69
	72
	234
	327.649
	73
	314.43
	120.509
	96
	81
	100
	273
	104
	143
	119
	284
	110
	111
	278
	224
	71
	79
	67
	77
	85
	121
	218
	71
	70.0063
	62
	168
	81
	80
	187
	169
	96
	64
	113.917
	215.996
	95
	198
	207
	69
	66
	187
	203
	207
	176
	145
	80
	227
	212
	274
	65
	410.7
	65
	61
	235
	150.275
	77
	551.502
	92
	533
	485.339
	173
	208
	142
	68
	74
	86
	81
	92
	532.252
	270
	202
	126
	128
	286
	519.322
	100
	140.407
	227
	64
	117
	95
	132
	102
	238.273
	104
	284.769
	371
	118
	130
	167
	260
	289
	416.939
	462.403
	100
	145
	69
	119
	374.139
	129
	295
	433.293
	155
	69
	236
	261
	134
	85
	92
	84
	117.896
	246
	164
	138
	98
	85
	72
	462
	76
	79
	192
	241
	85
	293
	552
	111
	420
	63
	442
	221
	552
	118.387
	125
	134
	100
	152.749
	98
	281
	141
	382
	102
	67
	72
	333.914
	132
	372
	76
	137
	66
	82
	116
	76.345
	216
	71
	87
	120
	98.9246
	132
	173
	496
	137
	90.8374
	106
	109
	448
	111
	104
	148
	222
	65
	197
	76
	94
	236
	65
	307
	113
	368.564
	73
	84
	224
	178
	396
	88
	92
	152
	93
	129
	405.307
	71
	389.055
	113
	380
	75
	73
	283.295
	128.41
	143
	232
	140
	299
	63.9843
	70
	137
	104
	74
	256
	70
	130
	68
	161
	103
	380
	168
	62
	152
	98
	240
	162
	171
	61
	201
	73
	71
	77
	212
	123
	138
	96
	335
	172
	172
	439.532
	105
	412.01
	76
	218
	496
	91
	81
	256
	224
	72
	107
	281
	221
	194
	71
	534
	552
	463.556
	74.7275
	62
	236
	88
	65
	76
	246
	64
	148
	487
	227
	369.19
	552
	137
	97
	123
	69
	132
	376.822
	93
	72
	282
	69
	416.93
	409
	234
	81
	91
	490.143
	152
	207
	151
	126
	225
	250
	139
	77
	91
	66
	107
	186.226
	222
	76
	78
	65
	74
	98
	67
	138
	144
	246
	128
	125.759
	411
	332
	551
	65
	382
	80
	258
	63
	75
	198
	533
	135.487
	166
	284
	195
	233.515
	104
	138
	243
	295
	199
	174.539
	84
	114
	65
	423
	268
	118
	543.922
	195
	408.542
	190
	84
	231
	208
	133
	237
	142
	67
	78
	152
	62
	220
	552
	394.57
	289
	65
	240
	97
	67
	208
	84.1113
	197
	277.399
	96
	106
	111
	119
	91
	81
	79
	246
	371
	222
	69
	289
	241
	297
	71
	103
	143
	249.432
	345.547
	106
	119
	63
	396.572
	156
	224
	194
	61
	112
	536
	63
	79
	197
	149
	151
	117
	77
	110
	172
	110
	194
	84
	326
	138
	280
	214
	130
	234.242
	167
	491
	299
	93
	77
	99
	184
	156
	215
	70
	361
	207
	290
	77
	85
	64
	77
	146
	63
	279
	81.1328
	79
	136
	107
	76
	145
	77
	62
	533
	109
	252
	65
	131
	148
	79
	153
	202.619
	338
	65
	197
	146
	437
	504.541
	91
	63
	424
	126
	344.175
	369.688
	92
	148
	551
	148
	199.343
	284
	240
	499
	77
	472.674
	68
	453.854
	111
	202
	371
	82
	74
	74
	298
	81
	216
	133
	82
	69
	69
	101
	193
	458
	98
	442
	304.404
	95
	73
	194
	62
	295.55
	208
	486
	241
	168
	71
	246
	178
	103
	254
	92
	81
	75
	86
	94
	91
	552
	119
	182
	154
	392
	536
	152
	105
	212.283
	62
	244.373
	98
	129
	67
	65
	71
	97
	93
	167
	97
	271
	396.603
	65
	93
	327
	116
	100
	144
	68
	249
	235
	162
	70
	76
	82.086
	335.775
	169
	464
	458
	145
	74
	96
	353.659
	117
	212.984
	111
	71
	278
	224
	139
	390
	270
	132
	90
	93
	64
	358.228
	81
	174
	166
	69
	120
	204
	95
	214
	169
	125
	84
	340.081
	498
	152
	88
	140
	73
	90
	65
	182
	130.323
	448.227
	115
	64.2289
	72
	393.344
	353.652
	208
	194
	123
	83
	540.811
	94
	116
	73
	256
	102
	62
	127
	246
	231.121
	298
	270
	101
	126
	449.019
	107
	140
	120
	95
	371
	238
	138
	79
	64
	81
	64
	118
	136
	117
	74
	90
	281
	252
	73
	170
	491.888
	410.056
	246
	77
	391.648
	254
	85
	117
	145.372
	78
	183
	534
	140
	171
	93
	107
	533
	101.255
	148
	132
	74
	78
	403.824
	81
	146
	376.691
	150.779
	66
	80
	278
	444
	71
	172
	69
	157
	437.493
	117
	329
	243
	63
	141
	124
	144
	97.3787
	552
	224.818
	151
	69
	69
	90
	237
	72
	62
	203
	229
	324
	299
	62
	100
	128
	89
	99
	133
	496
	69
	84
	222
	178
	343.474
	88
	82
	102
	217
	114
	336
	103
	108
	160
	199
	64
	123
	100
	83
	111
	129
	138
	83
	145
	97
	62
	317.491
	94.6591
	159
	106
	67
	335
	73
	261
	112
	201
	179
	80
	69
	144
	102
	86
	202
	371
	76
	281
	409
	261
	71
	202.306
	121
	157
	224
	293
	103
	209
	62
	88
	368
	462
	111
	416
	220
	110
	106
	75
	194
	127
	63
	157
	64
	156.176
	97
	411
	70
	371
	261
	278
	552
	301
	199
	62
	404.901
	107
	206
	90.9953
	80
	437
	109
	65
	254
	85
	117
	167
	533
	90
	158
	131
	125
	150
	147
	98
	65
	75
	113
	102
	239.956
	147
	289
	68
	62
	250
	126.523
	402.016
